# Supplementary material
Source: MDPI journal article supplement (https://www.mdpi.com/2073-4344/12/8/904)
Supplement: s1 [file s1]

# Chitin and Silk Fibroin Biopolymers Modified by Oxone: Efficient Heterogeneous Catalysts for Knoevenagel reaction

Fernando B. Neves <sup>1</sup>, Lucas L. Zanin <sup>2</sup>, Rayanne R. Pereira <sup>1,3</sup>, José Otávio C. S. Júnior <sup>3</sup>, Roseane Maria R. Costa <sup>3</sup>, André L. M. Porto <sup>2</sup>, Sérgio A. Yoshioka <sup>4</sup>, Alex Nazaré de Oliveira <sup>1</sup>, David E. Q. Jimenez <sup>1,\*</sup> and Irlon M. Ferreira <sup>1,\*</sup>

<sup>1</sup> Applied Organic Synthesis and Biocatalysis Laboratory, Chemistry Course, Federal University of Amapá, Marco Zero University Campus of Ecuador, KM-02 Bairro Zéão, Macapá, AP, 68902-280, AP, Brazil

<sup>2</sup> Organic Chemistry and Biocatalysis Laboratory, São Carlos Institute of Chemistry, University of São Paulo, Av. John Dagnone, 1100, Ed. Environmental Chemistry, Santa Angelina, 13563-120, São Carlos, São Paulo, Brazil

<sup>3</sup> Cosmetic Laboratory, Faculty of Pharmaceutical Sciences, Federal University of Pará, 66075-110, Belém, Pará, Brazil

<sup>4</sup> Biochemistry and Biomaterials Laboratory, Institute of Chemistry of São Carlos, University of São Paulo, Universidade de São Paulo, Av. Trabalhador São-Carlense, 400, 13560-970, São Carlos, SP, Brazil

\* Correspondence: derteriom@unifap.br (D.E.Q.J.) and irlon.ferreira@unifap.br (I.M.F.)

## 2-benzylidenemalononitrile (2a)

$C_{10}H_6N_2$ , 154.17 g.mol<sup>-1</sup>; (99 % yield); White crystal, m.p. = 82–84 °C; FTIR  $\nu_{max}(cm^{-1})$  (pure) = 3032, 2223, 1591, 1566, 1541, 1450, 1217, 956, 756, 678, 617; <sup>1</sup>H NMR (400 MHz, CDCl<sub>3</sub>)  $\delta$  (ppm) = 7.90 (m, 2H), 7.76 (s, 1H), 7.64 (m, 1H), 7.54 (m, 2H); <sup>13</sup>C NMR (100 MHz, CDCl<sub>3</sub>)  $\delta$  (ppm) = 159.9, 134.6, 130.7, 129.6, 113.7, 112.5, 82.9; MS (70 eV)  $m/z$  = 154 (M<sup>+</sup>, 100%), 127 (88%), 103 (60%).

## 2-(4-methyl-benzylidene)malononitrile (2b)

$C_{11}H_8N_2$ , 168.20 g.mol<sup>-1</sup>; (98% yield); Brown crystal, m.p. = 134–136 °C; FTIR  $\nu_{max}(cm^{-1})$  (pure) = 3115, 3039, 2231, 1604, 1579, 1521, 1490, 1371, 1354, 1344, 1321, 1303, 1213, 935, 850, 833, 746, 682, 619.; <sup>1</sup>H NMR (500 MHz, CDCl<sub>3</sub>)  $\delta$  (ppm) = 7.82–7.80 (d,  $J$  = 8.0 Hz, 2H), 7.72 (s, 1H), 7.35–7.33 (d,  $J$  = 8.0 Hz, 2H), 2.46 (s, 3H).; <sup>13</sup>C NMR (126 MHz, CDCl<sub>3</sub>)  $\delta$  (ppm) = 159.8, 146.4, 130.9, 130.9, 130.4, 128.5, 114.0, 112.8, 81.2, 22.0.; MS (70 eV),  $m/z$  = 168 (M<sup>+</sup>, 100%).

## 2-(4-(dimethylaminobenzylidene)malononitrile (2c)

$C_{11}H_{15}N_3$ , 197.24 g.mol<sup>-1</sup>; (91% yield); Orange crystal, m.p = 176–179 °C; FTIR  $\nu_{max}(cm^{-1})$  (pure) = 3084, 3047, 2225, 1612, 1595, 1527, 1479, 1382, 1355, 1340, 1313, 1215, 1153, 1111, 1097, 952, 929, 827, 817, 738, 673, 619.; <sup>1</sup>H NMR (400 MHz, CDCl<sub>3</sub>)  $\delta$  (ppm) = 7.80–7.77 (d,  $J$  = 8.0 Hz, 2H), 7.43 (s, 1H), 6.68–6.66 (d,  $J$  = 8.0 Hz, 2H), 3.12 (s, 6H).; <sup>13</sup>C NMR (100 MHz, CDCl<sub>3</sub>)  $\delta$  (ppm) = 190.3, 158.0, 154.2, 133.7, 119.3, 115.9, 114.9, 111.6, 71.19, 40.0.; MS (70 eV),  $m/z$  = 197 (M<sup>+</sup>, absent), 188 (52%), 153 (100%).

## 2-(3,4,5-trimethoxybenzylidene)malononitrile (2d)

$C_{13}H_{12}N_2O_3$ , 244.25 g.mol<sup>-1</sup>; (92% yield); Yellow crystal; m.p = 142–145 °C; FTIR  $\nu_{max}(cm^{-1})$  (pure) = 3091, 3021, 2225, 1577, 1552, 1489, 1408, 1288, 1213, 1072, 1006, 937, 823, 615, 518; <sup>1</sup>H NMR (500 MHz, CDCl<sub>3</sub>)  $\delta$  (ppm) = 7.63 (s, 2H), 7.17 (s, 1H), 3.96 (s, 3H), 3.89 (s, 6H).; <sup>13</sup>C NMR (126 MHz, CDCl<sub>3</sub>)  $\delta$  (ppm) = 159.32, 153.35, 144.03, 125.89, 113.94, 113.15, 108.31, 80.59, 61.21, 56.34, 29.66; MS (70 eV),  $m/z$  = 244 (M<sup>+</sup>, 100).

## 2-(4-hydroxy-3-methoxybenzylidene)malononitrile (2e)

$C_{11}H_8N_2O_2$ , 200.20 g.mol<sup>-1</sup>; (94% yield); Yellow solid, m.p. = 134–135 °C; FTIR  $\nu_{max}(cm^{-1})$  (pure) = 3394, 2227, 1618, 1564, 1514, 1282, 1138; <sup>1</sup>H NMR (400 MHz, MeOD)  $\delta$  (ppm) = 7.94 (s, 1H), 7.57–7.56 (d,  $J$  = 2.5 Hz, 1H), 7.44–7.42 (m, 1H), 7.08–7.06 (d,  $J$  = 8.5 Hz, 1H), 3.95 (s, 3H); <sup>13</sup>C NMR (100 MHz, MeOD)  $\delta$  (ppm) = 159.83, 153.67, 146.02, 126.14, 124.72,

**Citation:** Neves, F.B.; Zanin, L.L.; Pereira, R.R.; Otávio C, J.; Costa, R.M.R.; Porto, A.L.M.; Yoshioka, S.A.; de Nazaré de Oliveira, A.; Jimenez, D.E.Q.; Ferreira, I.M. Chitin and Silk Fibroin Biopolymers Modified by Oxone: Efficient Heterogeneous Catalysts for Knoevenagel reaction. *Catalysts* **2022**, *12*, 904. <https://doi.org/10.3390/catal12080904>

Academic Editor: Valeria La Parola; Leonarda Francesca Liotta

Received: 10 July 2022

Accepted: 29 July 2022

Published: 17 August 2022

**Publisher's Note:** MDPI stays neutral with regard to jurisdictional claims in published maps and institutional affiliations.

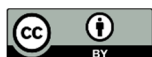

**Copyright:** © 2022 by the authors. Submitted for possible open access publication under the terms and conditions of the Creative Commons Attribution (CC BY) license (<https://creativecommons.org/licenses/by/4.0/>).

115.25, 114.34, 111.14, 77.12, 55.22; MS (70 eV)  $m/z$  = 200 ( $M^+$ , absent), 170 (100%), 142 (47%), 119 (42%).

### 2-(4-fluorobenzylidene)malononitrile (2f)

$C_{10}H_5N_2F$ , 172.16 g.mol<sup>-1</sup>; (98 % yield); White crystal, m.p. = 121–123 °C; FTIR  $\nu_{max}(cm^{-1})$  (pure) = 3078, 3035, 2939, 2229, 1597, 1575, 1506, 1415, 1379, 1305, 1244, 1163, 1107, 943, 839, 804, 617, 563, 530, 410;  $^1H$  NMR (400 MHz,  $CDCl_3$ )  $\delta$  (ppm) = 7.98–7.96 (m, 2H), 7.75 (s, H), 7.27–7.23 (m, 2H);  $^{13}C$  NMR (100 MHz,  $CDCl_3$ )  $\delta$  (ppm) = 166.11 (d,  $^1J_{C-F}$  = 207 Hz), 158.24, 133.44, 133.37, 127.36, 117.18, 113.53, 112.46, 82.49; MS (70 eV),  $m/z$  = 172 ( $M^+$ , 100%), 145 (89%), 121 (54%).

### 2-(4-chlorobenzylidene)malononitrile (2g)

$C_{10}H_5N_2Cl$ , 188.61 g.mol<sup>-1</sup>; (98% yield); White crystal, m.p. = 161–163 °C; FTIR  $\nu_{max}(cm^{-1})$  (pure) = 3084, 3047, 2225, 1612, 1595, 1527, 1479, 1382, 1355, 1340, 1215, 1153, 1111, 1097, 952, 929, 827, 817, 738, 673, 619;  $^1H$  NMR (500 MHz,  $CDCl_3$ )  $\delta$  (ppm) =  $\delta$  7.78–7.76 (d,  $J$  = 8.5 Hz, 2H), 7.72 (s, 1H), 7.70–7.69 (d,  $J$  = 8.5 Hz, 2H);  $^{13}C$  NMR (126 MHz,  $CDCl_3$ )  $\delta$  (ppm) = 158.5, 133.2, 131.9, 130.1, 129.8, 113.6, 112.5, 83.5; MS (70 eV)  $m/z$  = 188 ( $M^+$ , 57%), 161 (25%), 153 (100%).

### 2-(4-bromobenzylidene)malononitrile (2h)

$C_{10}H_5N_2Br$ , 232.07 g.mol<sup>-1</sup>; (97% yield); White crystal, m.p. = 165–166 °C; FTIR  $\nu_{max}(cm^{-1})$  (pure) = 3091, 3032, 2225, 1577, 1552, 1489, 1408, 1288, 1213, 1072, 1006, 937, 823, 615, 516;  $^1H$  NMR (400 MHz,  $CDCl_3$ )  $\delta$  (ppm) = 7.76–7.74 (d,  $J$  = 8.0 Hz, 2H), 7.69–7.65 (d,  $J$  = 8.0 Hz, 2H), 7.70 (s, 1H);  $^{13}C$  NMR (100 MHz,  $CDCl_3$ )  $\delta$  (ppm) = 158.4, 133, 131.8, 129.9, 129.6, 83.5; MS (70 eV)  $m/z$  = 232 ( $M^+$ , 31%), 234 ( $M^+$ , 30%), 153 (100%).

### 2-(4-hydroxybenzylidene)malononitrile (2i)

$C_{10}H_6N_2O$ , 170.17 g.mol<sup>-1</sup>; (90 % yield); Yellow solid, m.p. = 187–190 °C; FTIR  $\nu_{max}(cm^{-1})$  (pure) = 3352, 2225, 1610, 1579, 1566, 1519, 1444, 1436, 1300, 1220, 1174, 939, 839, 636, 607, 524;  $^1H$  NMR (500 MHz,  $CDCl_3$ )  $\delta$  (ppm) = 7.89–7.88 (d,  $J$  = 9.0 Hz, 2H), 7.87 (s, 1H), 6.92 (d,  $J$  = 9.0 Hz, 2H);  $^{13}C$  NMR (126 MHz,  $CDCl_3$ )  $\delta$  (ppm) = 164.0, 159.8, 133.7, 123.1, 116.3, 114.6, 113.6, 76.0; MS (70 eV)  $m/z$  = 170 ( $M^+$ , 100%), 142 (44%), 142 (21%), 119 (38%).

### 2-(4-nitrobenzylidene)malononitrile (2j)

$C_{10}H_5N_3O_2$ , 199.17 g.mol<sup>-1</sup>; (99 % yield); Orange crystal, m.p. = 155–157 °C; FTIR  $\nu_{max}(cm^{-1})$  (pure) = 3021, 2227, 1597, 1589, 1579, 1411, 1263, 1234, 1024, 974, 802, 692, 619;  $^1H$  NMR (500 MHz,  $CDCl_3$ )  $\delta$  (ppm) = 8.38–8.36 (d,  $J$  = 8.8 Hz, 2H), 8.07–8.04 (d,  $J$  = 8.8 Hz, 2H), 7.87 (s, 1H);  $^{13}C$  NMR (126 MHz,  $CDCl_3$ )  $\delta$  (ppm) = 156.82, 150.33, 135.76, 131.27, 124.60, 112.58, 111.55, 87.52; MS (70 eV)  $m/z$  = 199 ( $M^+$ , 84%), 169 (51%), 141 (68%), 126 (100%).

### 2-(4-cyanobenzylidene)malononitrile (2k)

$C_{11}H_5N_3$ , 179.18 g.mol<sup>-1</sup>; (92% yield); White crystal; m.p. = 151–154 °C; FTIR (pure)  $\nu_{max}(cm^{-1})$  = 2920, 2850, 2222, 1604, 1571, 1512, 1369, 1319, 1278, 1236, 1184, 1153, 1022, 833, 609, 570, 528.;  $^1H$  NMR (400 MHz,  $CDCl_3$ )  $\delta$  (ppm) = 7.81–7.79 (d,  $J$  = 8.0 Hz, 2H), 7.79 (s, 1H), 6.68–6.66 (d,  $J$  = 8.0, 2H).;  $^{13}C$  NMR (101 MHz,  $CDCl_3$ ); 190.3, 158.1, 154.2, 133.7, 119.3, 115.9, 114.8, 111.6, 110.9, 77.3, 76.9, 76.6.; MS (70 eV),  $m/z$  = 179 ( $M^+$ , 100%).

### 2-(2-methyl-3-phenylallylidene)malononitrile (2l)

$C_{13}H_{10}N_2$ , 194.24 g.mol<sup>-1</sup>; (95 % yield); Orange crystal; m.p. = 128–130 °C; FTIR  $\nu_{max}(cm^{-1})$  (pure) = 3338, 3198, 2957, 2203, 1681, 1595, 1522, 1372.;  $^1H$  NMR (500 MHz,  $CDCl_3$ )  $\delta$  (ppm) = 7.48–7.42 (m, 6H), 7.16–7.15 (m, 1H), 2.43 (d,  $J$  = 1.2 Hz, 3H).;  $^{13}C$  NMR (126 MHz,  $CDCl_3$ )  $\delta$  (ppm) = 164.4, 149.6, 134.5, 133.4, 130.3, 130.2, 128.8, 114.5, 112.8, 81.0, 14.9.; MS (70 eV),  $m/z$ : 194 ( $M^+$ , 75%), 193 (100%).

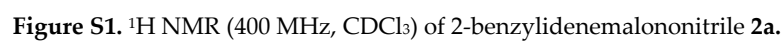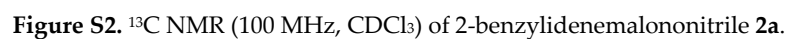

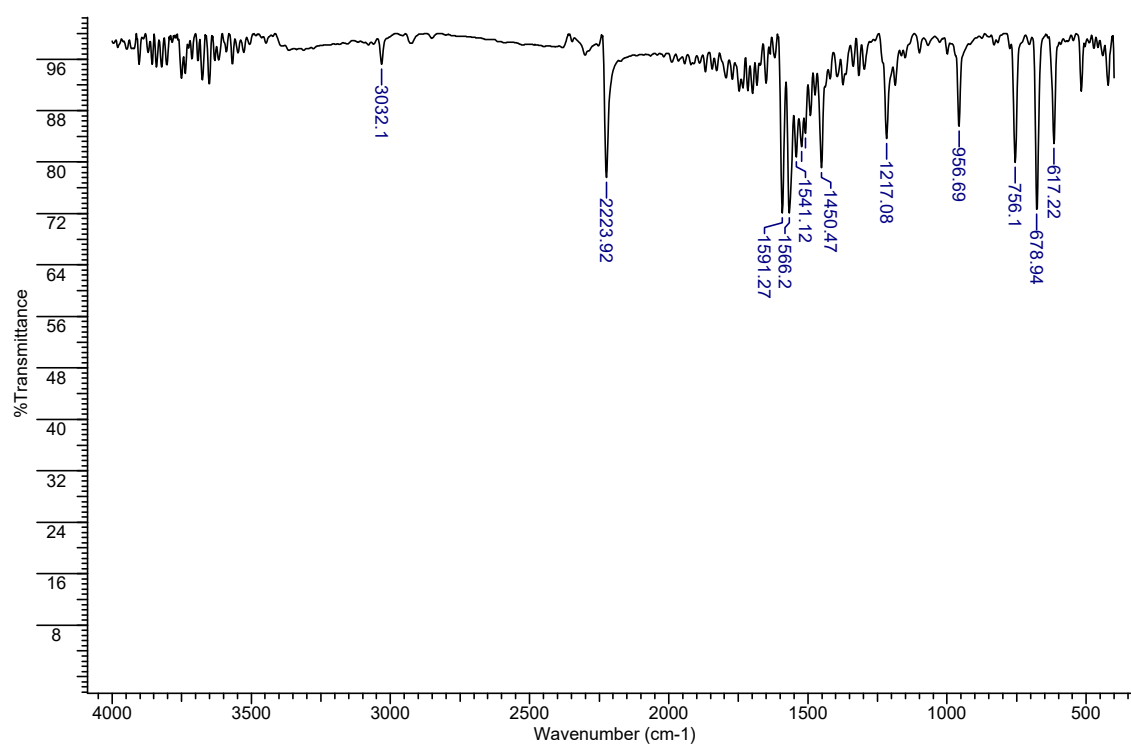

Figure S3. FT-IR of 2-benzylidenemalononitrile 2a.

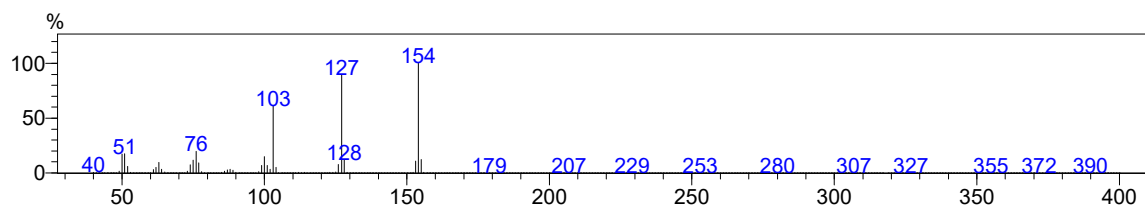

Figure S4. MS (70 eV) of 2-benzylidenemalononitrile 2a.

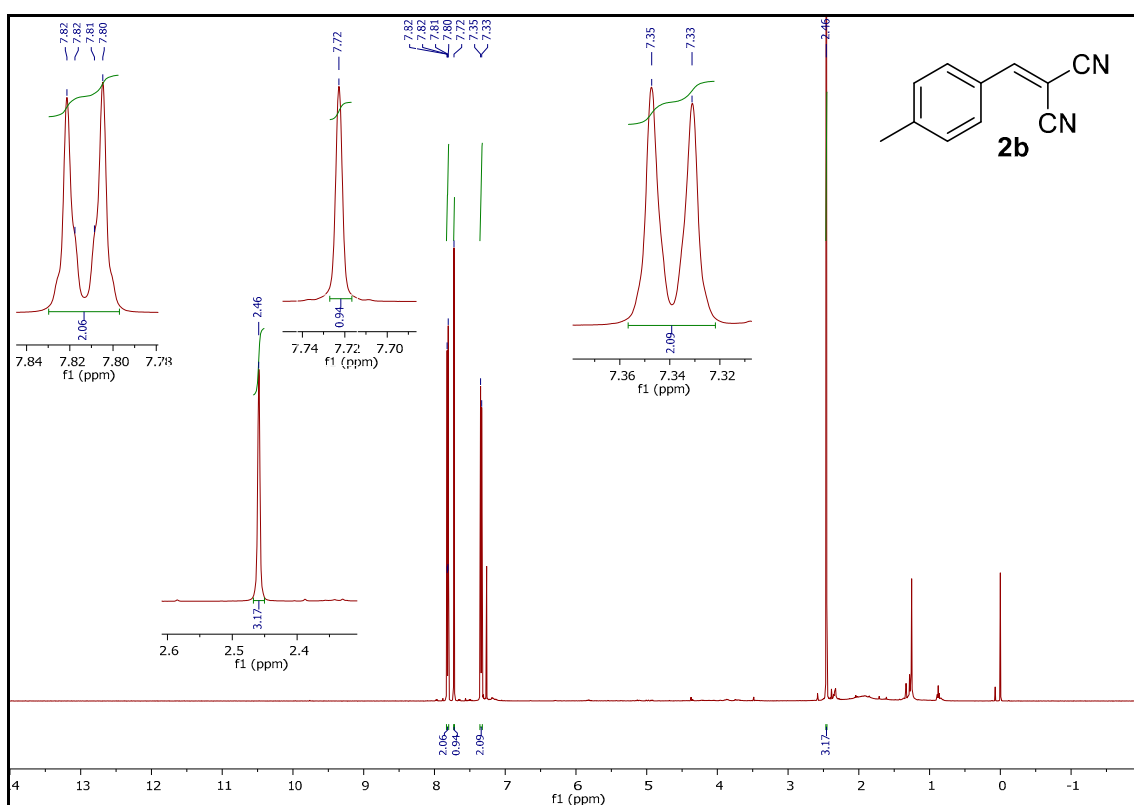

Figure S5. <sup>1</sup>H NMR (500 MHz, CDCl<sub>3</sub>) of 2-(4-methylbenzylidene)malononitrile **2b**.

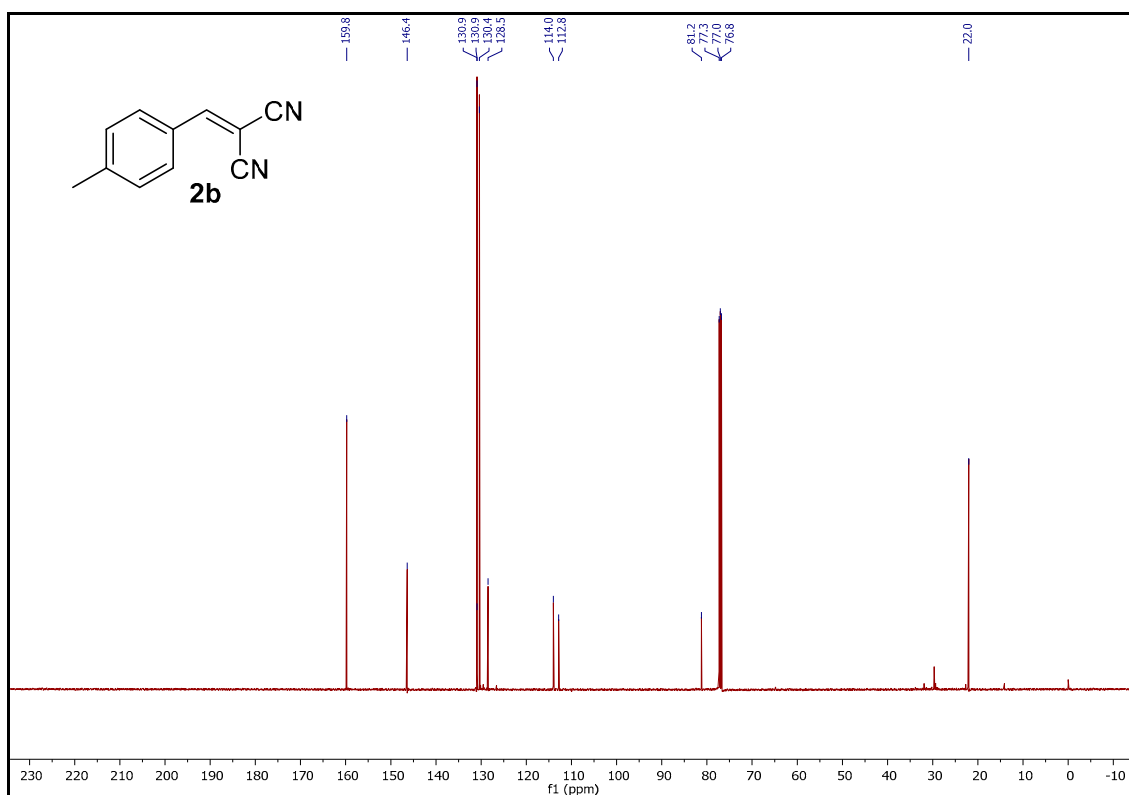

Figure S6. <sup>13</sup>C NMR (125 MHz, CDCl<sub>3</sub>) of 2-(4-methylbenzylidene)malononitrile **2b**.

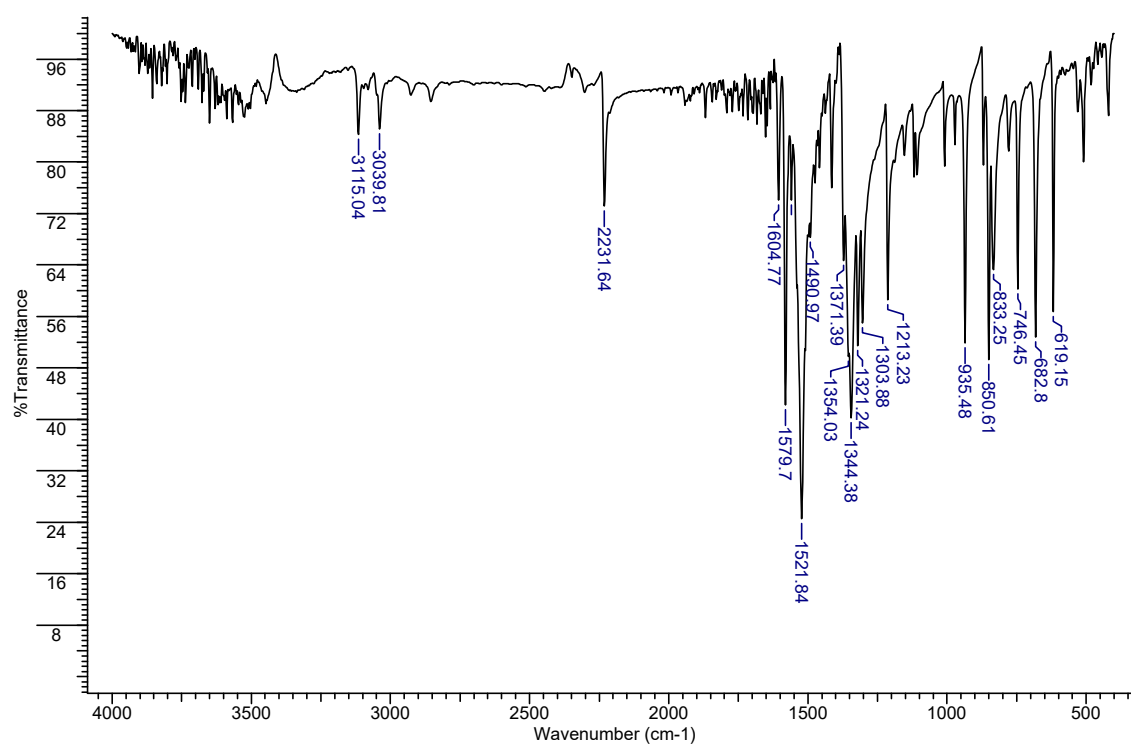

Figure S7. FT-IR of 2-(4-methylbenzylidene)malononitrile **2b**.

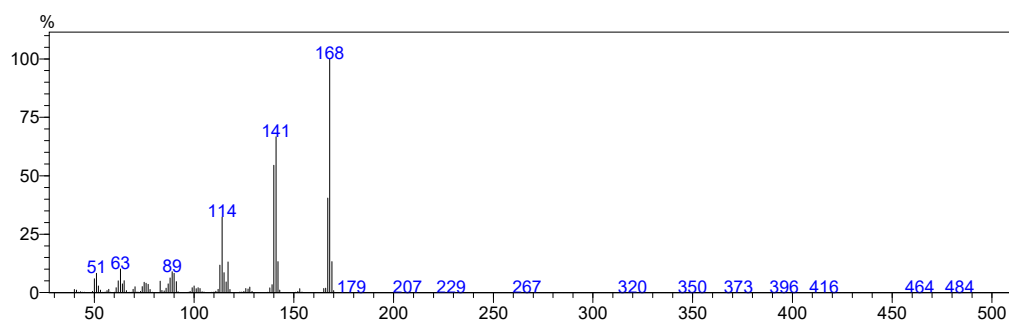

Figure S8. MS (70 eV) of 2-(4-methylbenzylidene)malononitrile **2b**.

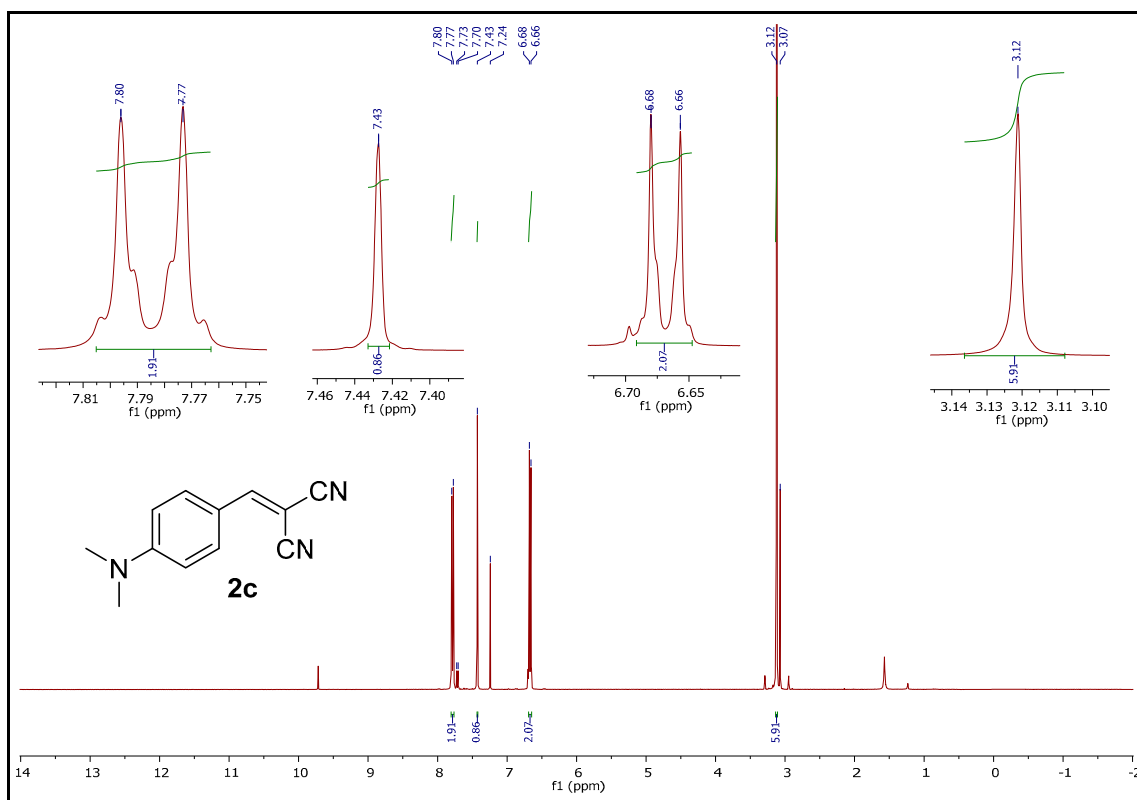

Figure S9. <sup>1</sup>H NMR (400 MHz, CDCl<sub>3</sub>) of 2-(4-(dimethylamino)benzylidene) malononitrile 2c.

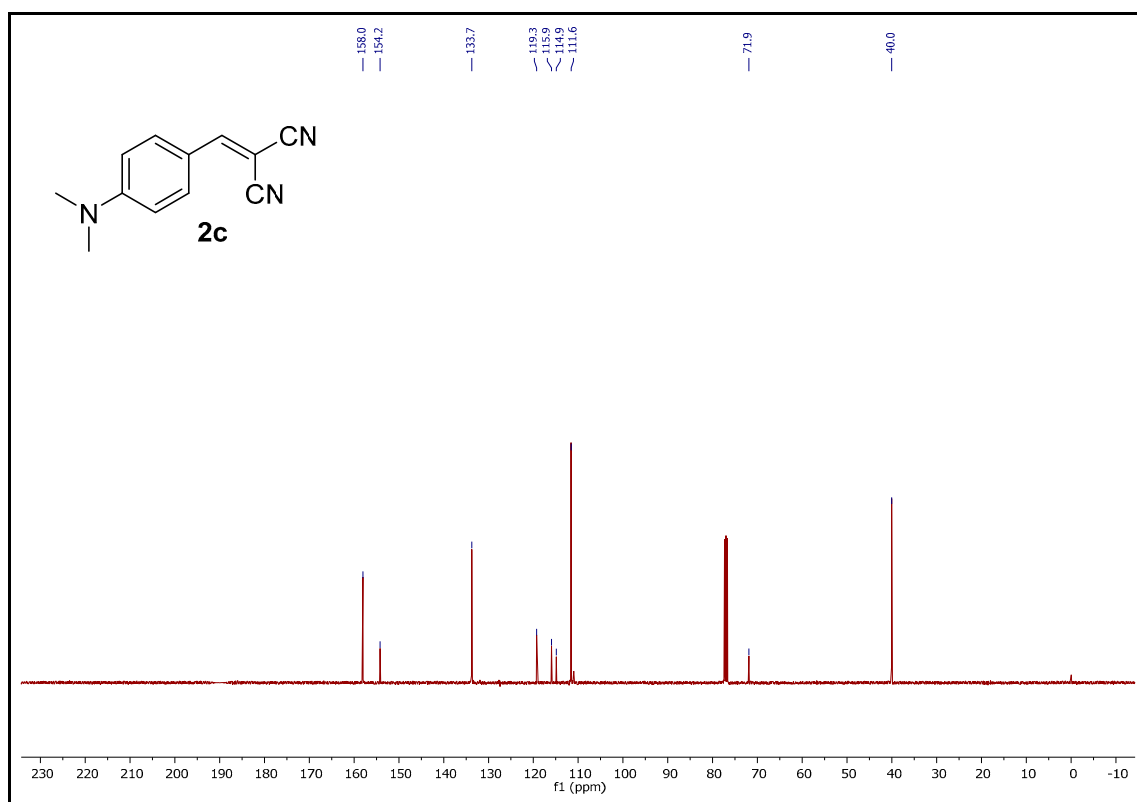

Figure S10. <sup>13</sup>C NMR (100 MHz, CDCl<sub>3</sub>) of 2-(4-(dimethylamino)benzylidene)malononitrile 2c.

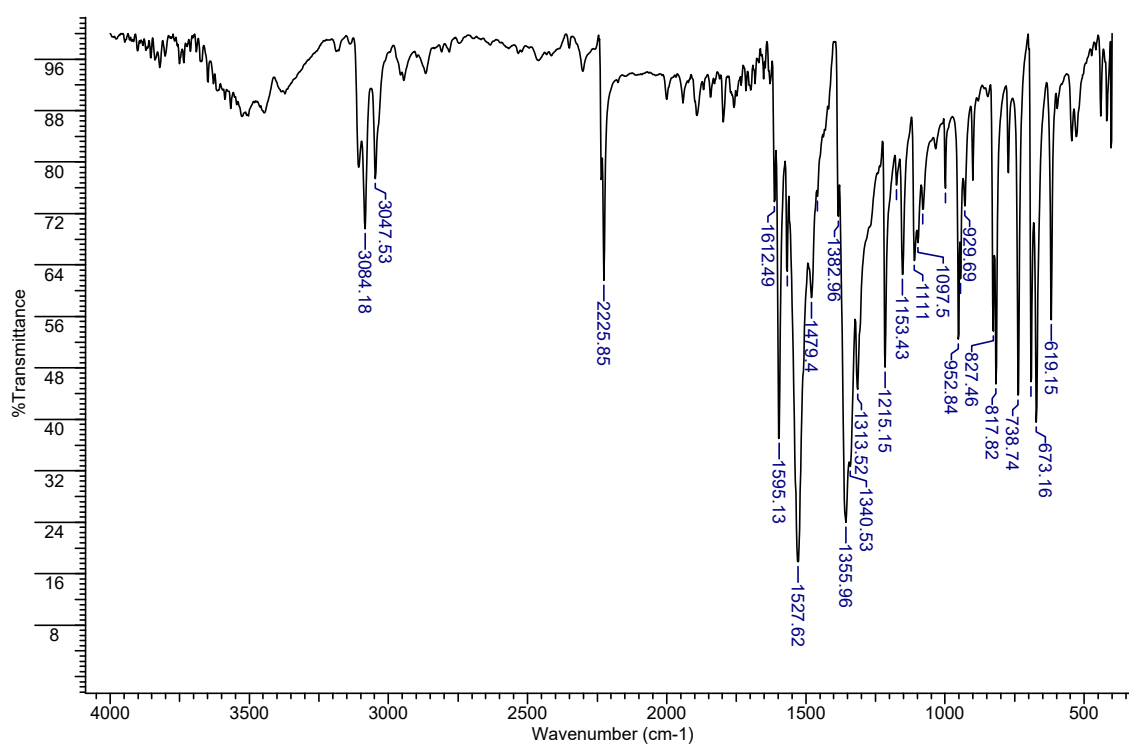

Figure S11. FT-IR of 2-(4-(dimethylamino)benzylidene)malononitrile 2c.

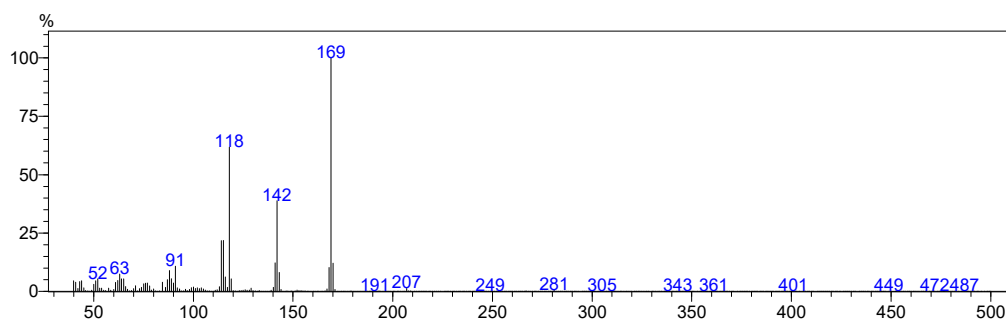

Figure S12. MS (70 eV) of 2-(4-(dimethylamino)benzylidene)malononitrile 2c.

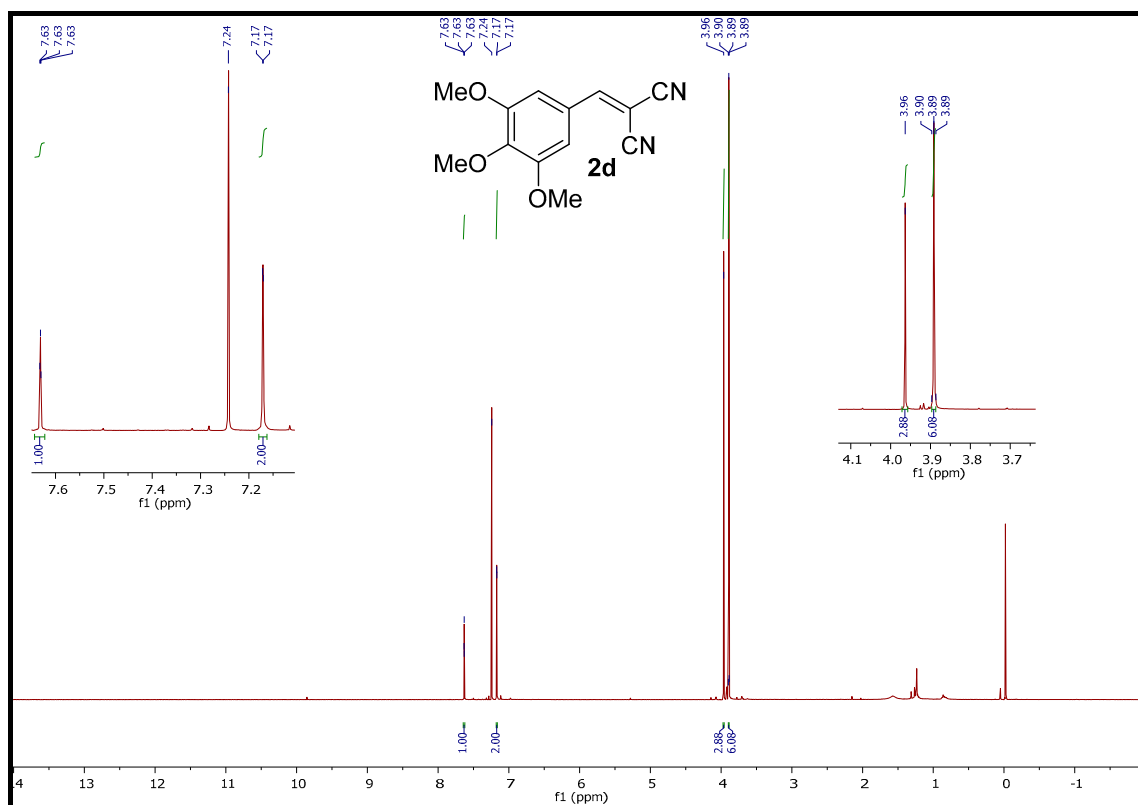

Figure S13. <sup>1</sup>H NMR (500 MHz, CDCl<sub>3</sub>) of 2-(3,4,5-trimethoxybenzylidene)malononitrile **2d**.

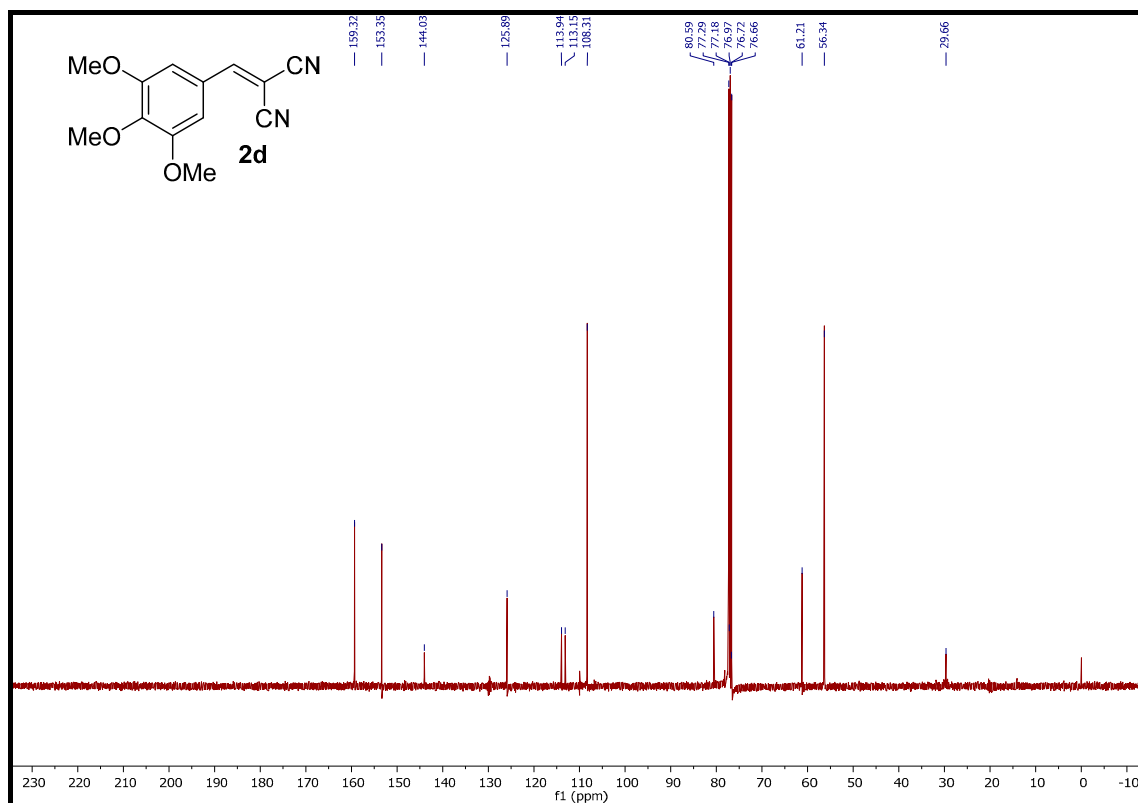

Figure S14. <sup>13</sup>C NMR (125 MHz, CDCl<sub>3</sub>) of 2-(3,4,5-trimethoxybenzylidene)malononitrile **2d**.

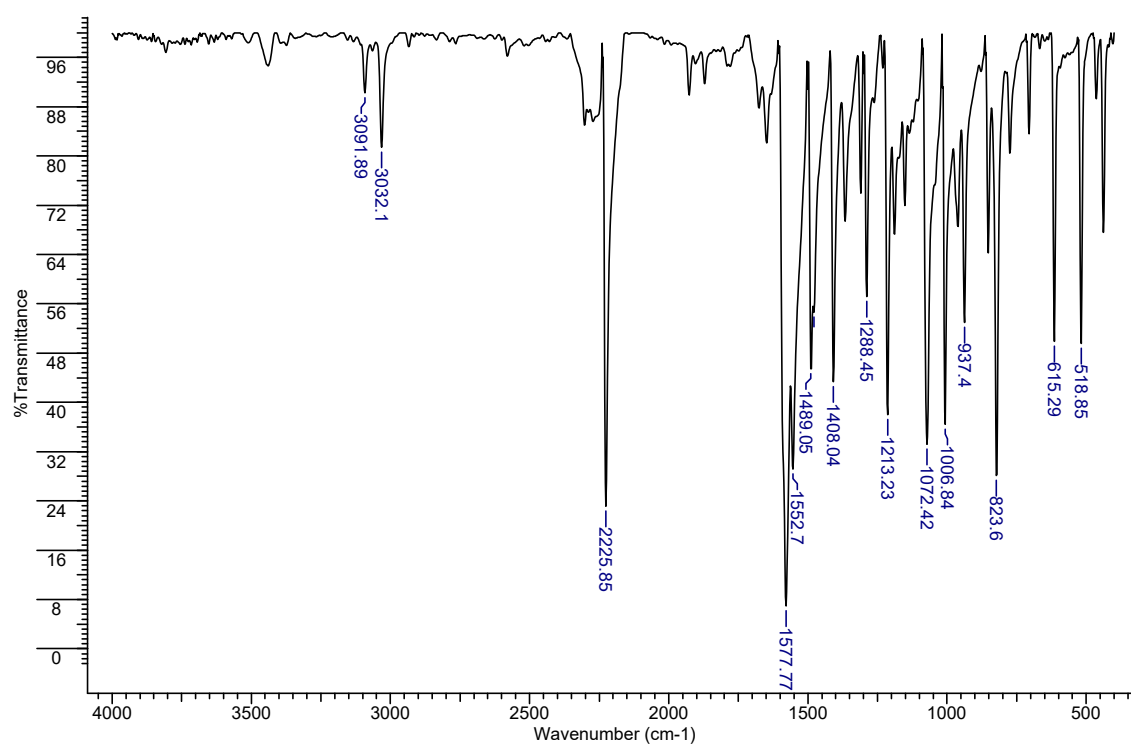

Figure S15. FT-IR of 2-(3,4,5-trimethoxybenzylidene)malononitrile **2d**.

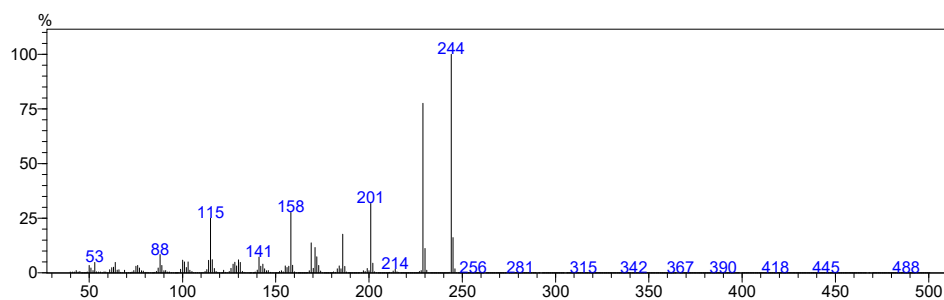

Figure S16. MS (70 eV) of 2-(3,4,5-trimethoxybenzylidene)malononitrile **2d**.

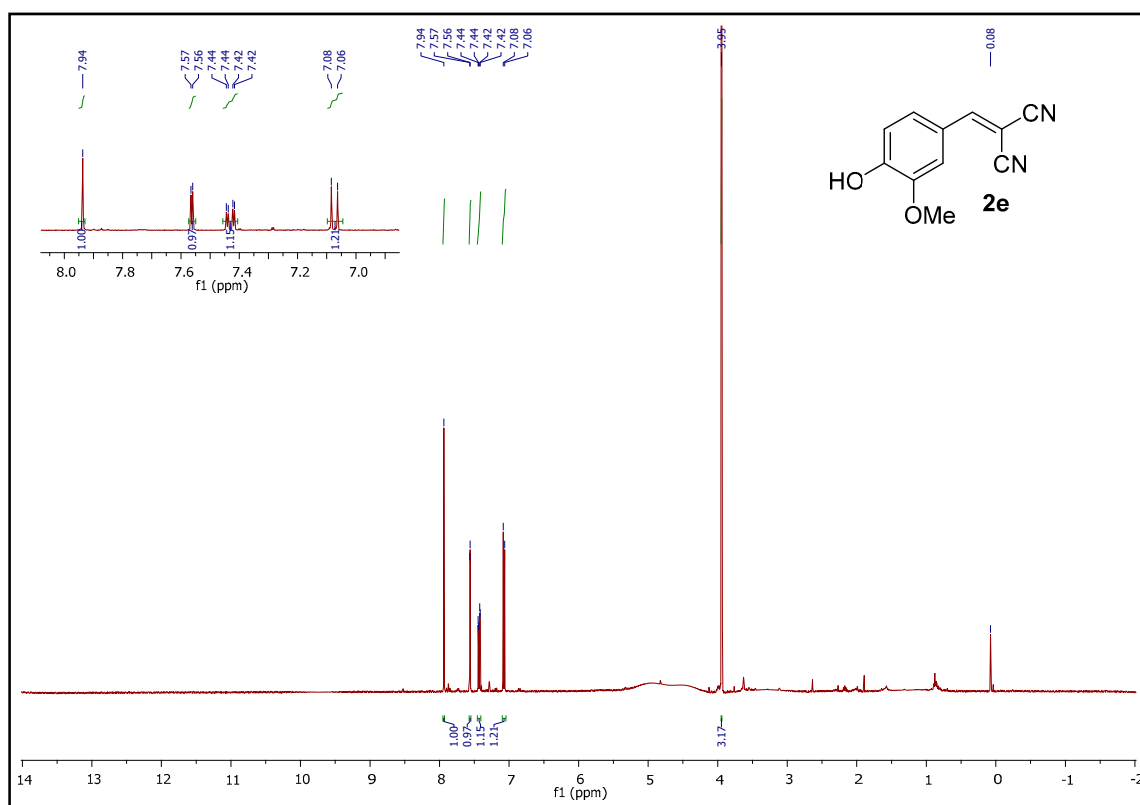

Figure S17. <sup>1</sup>H NMR (400 MHz, MeOD) of 2-(4-hydroxy-3-methoxybenzylidene)malononitrile **2e**.

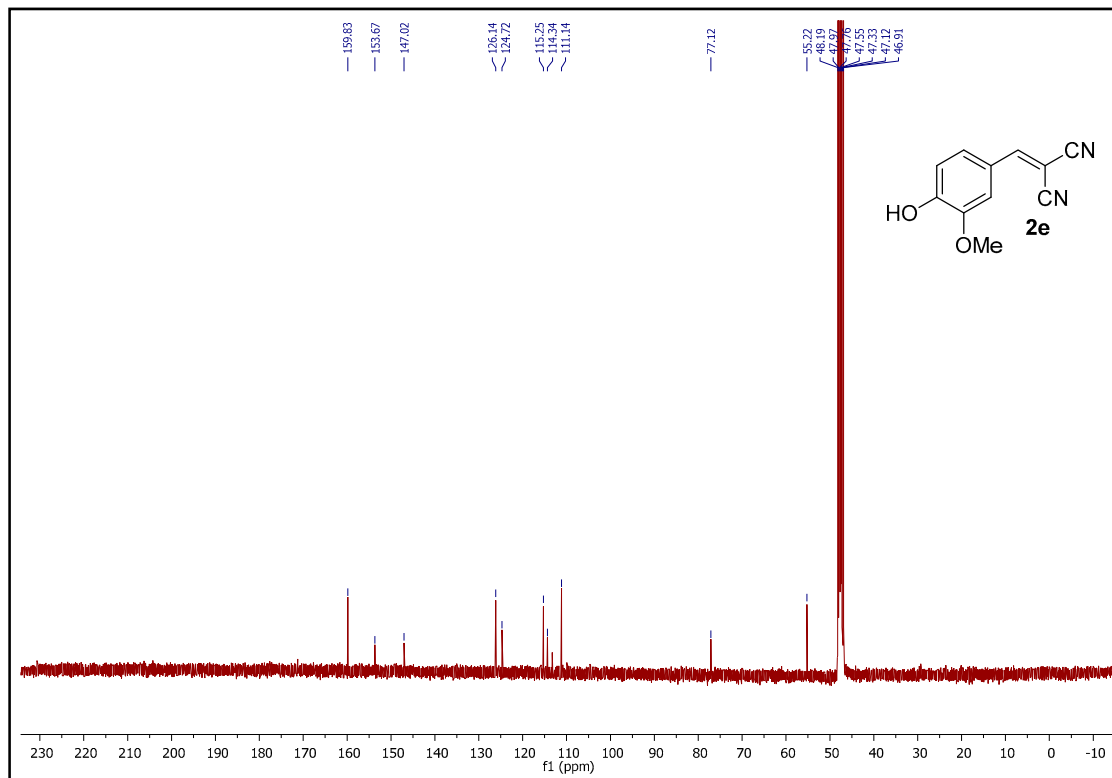

Figure S18. <sup>13</sup>C NMR (100 MHz, MeOD) of 2-(4-hydroxy-3-methoxybenzylidene)malononitrile **2e**.

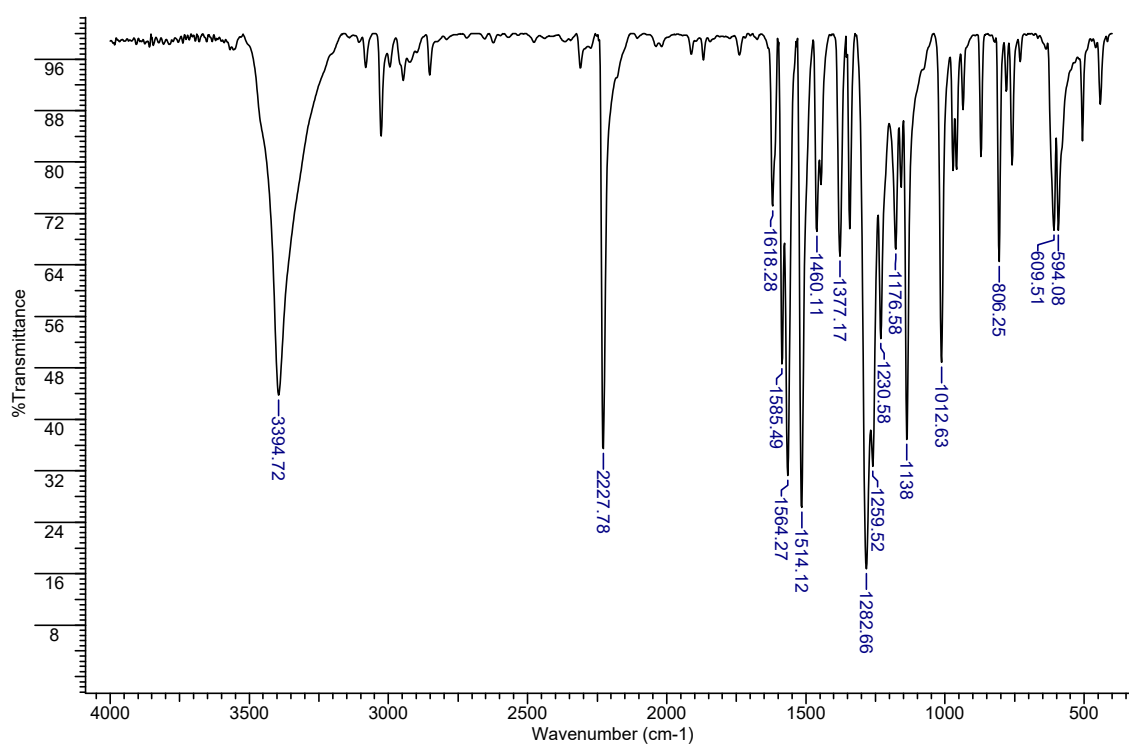

Figure S19. FT-IR of 2-(4-hydroxy-3-methoxybenzylidene)malononitrile **2e**.

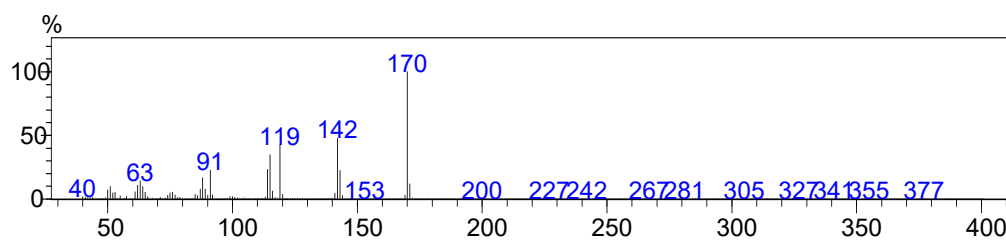

Figure S20. MS (70 eV) of 2-(4-hydroxy-3-methoxybenzylidene)malononitrile **2e**.

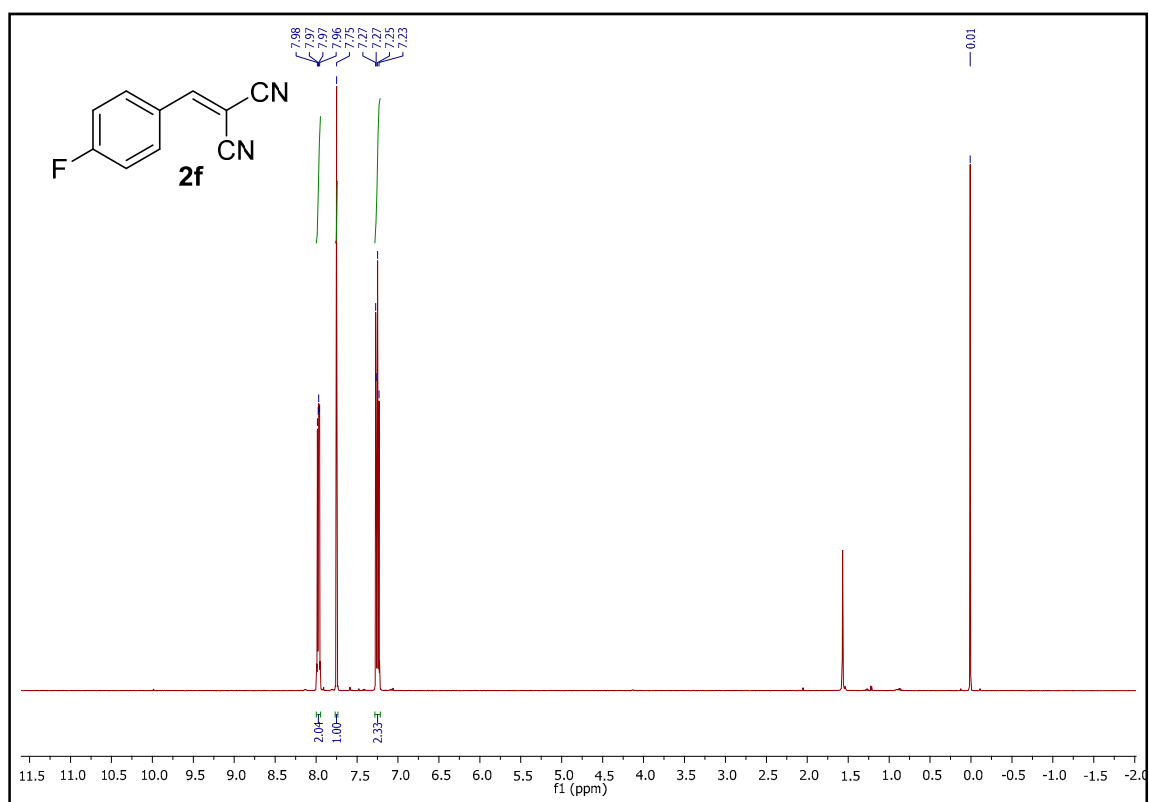

Figure S21. <sup>1</sup>H NMR (400 MHz, CDCl<sub>3</sub>) of 2-(4-fluorobenzylidene)malononitrile **2f**.

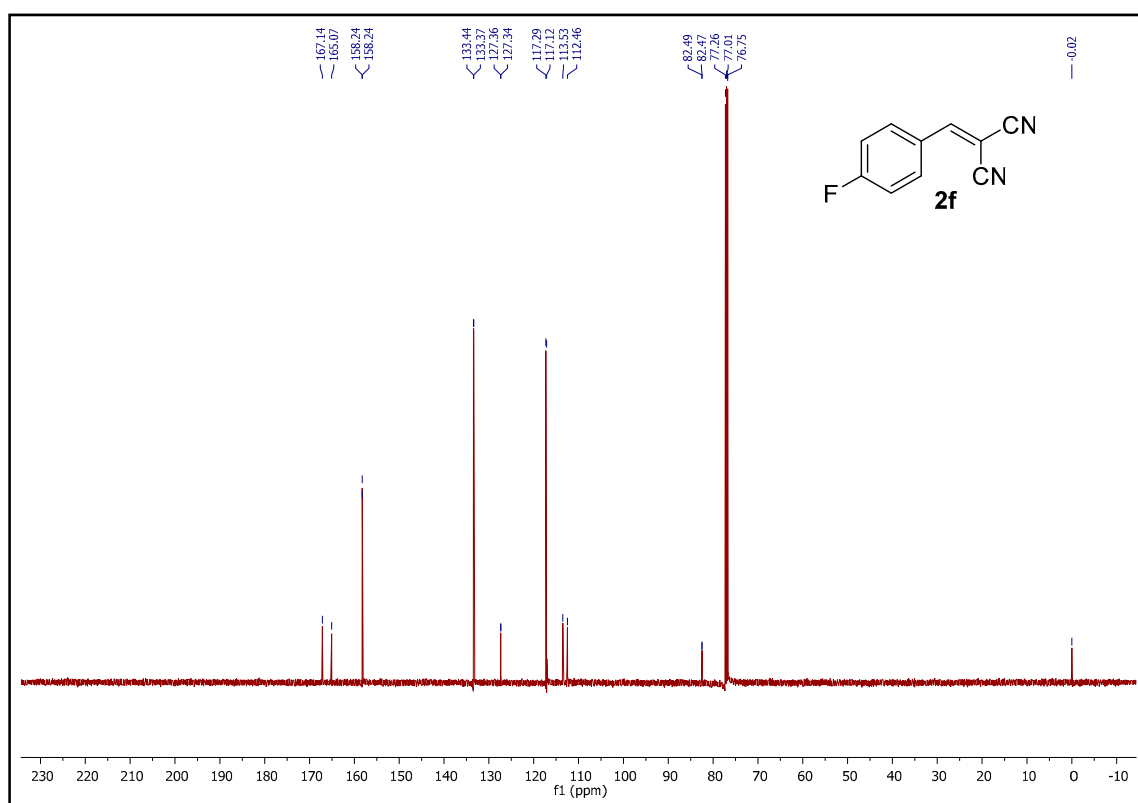

Figure S22. <sup>13</sup>C NMR (100 MHz, CDCl<sub>3</sub>) of 2-(4-fluorobenzylidene)malononitrile **2f**.

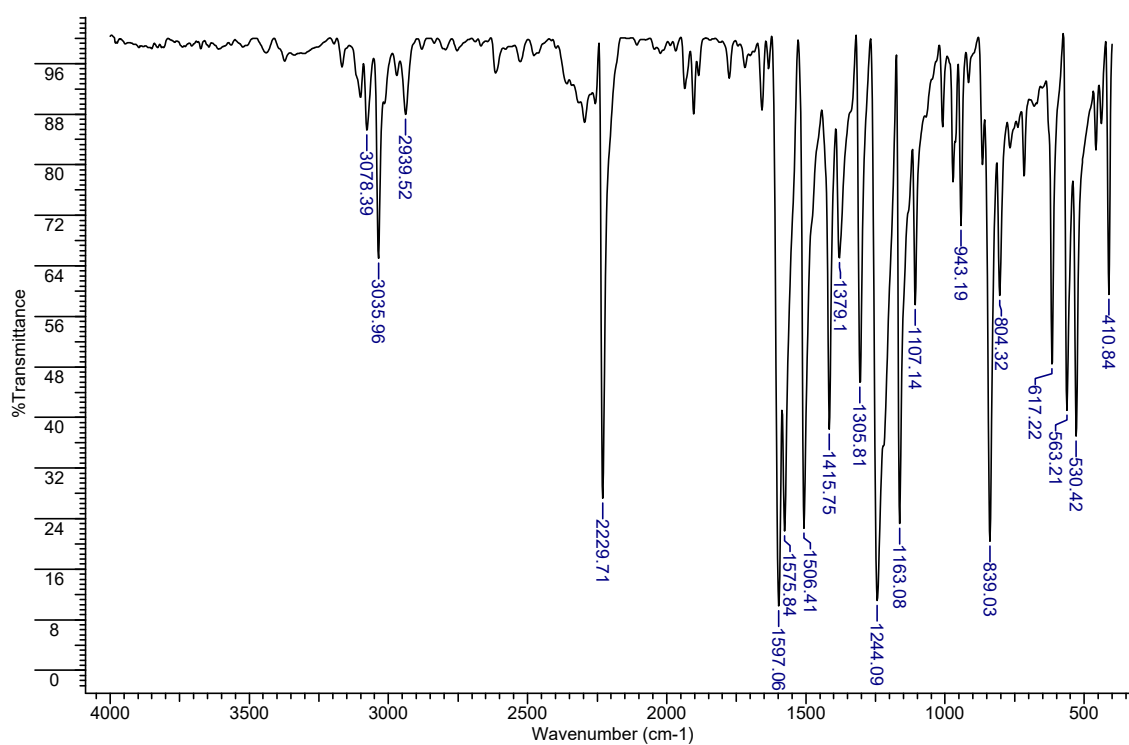

Figure S23. FT-IR of 2-(4-fluorobenzylidene)malononitrile **2f**.

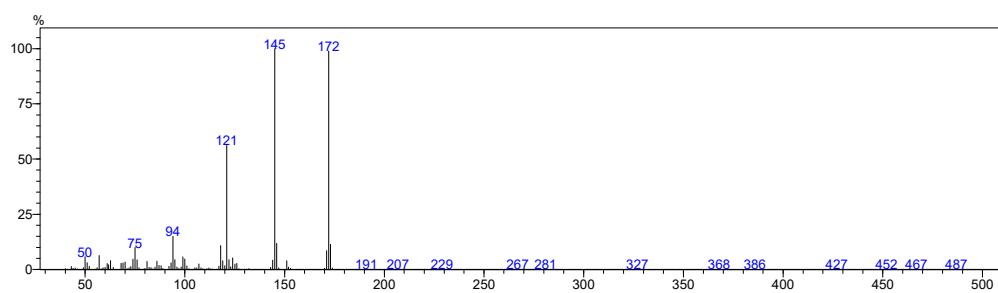

Figure S24. MS (70 eV) of 2-(4-fluorobenzylidene)malononitrile **2f**.

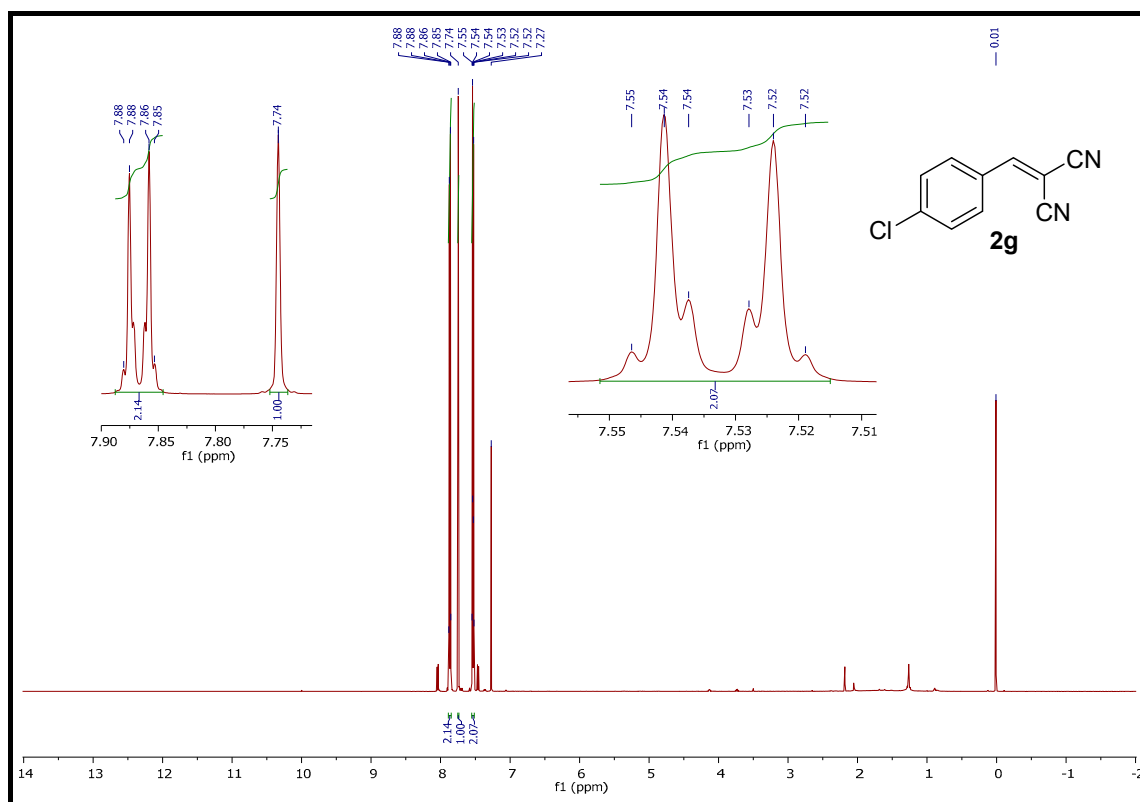

Figure S25. <sup>1</sup>H NMR (500 MHz, CDCl<sub>3</sub>) of 2-(4-chlorobenzylidene)malononitrile **2g**.

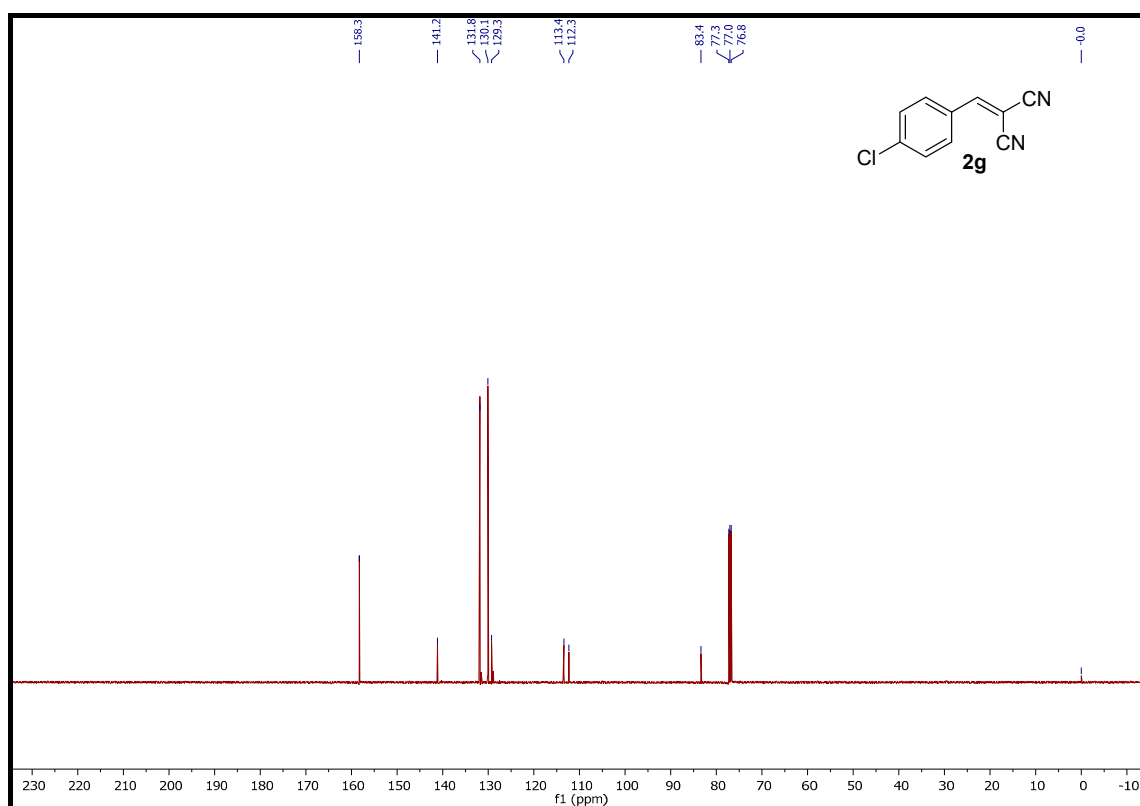

Figure S26. <sup>13</sup>C NMR (125 MHz, CDCl<sub>3</sub>) of 2-(4-chlorobenzylidene)malononitrile **2g**.

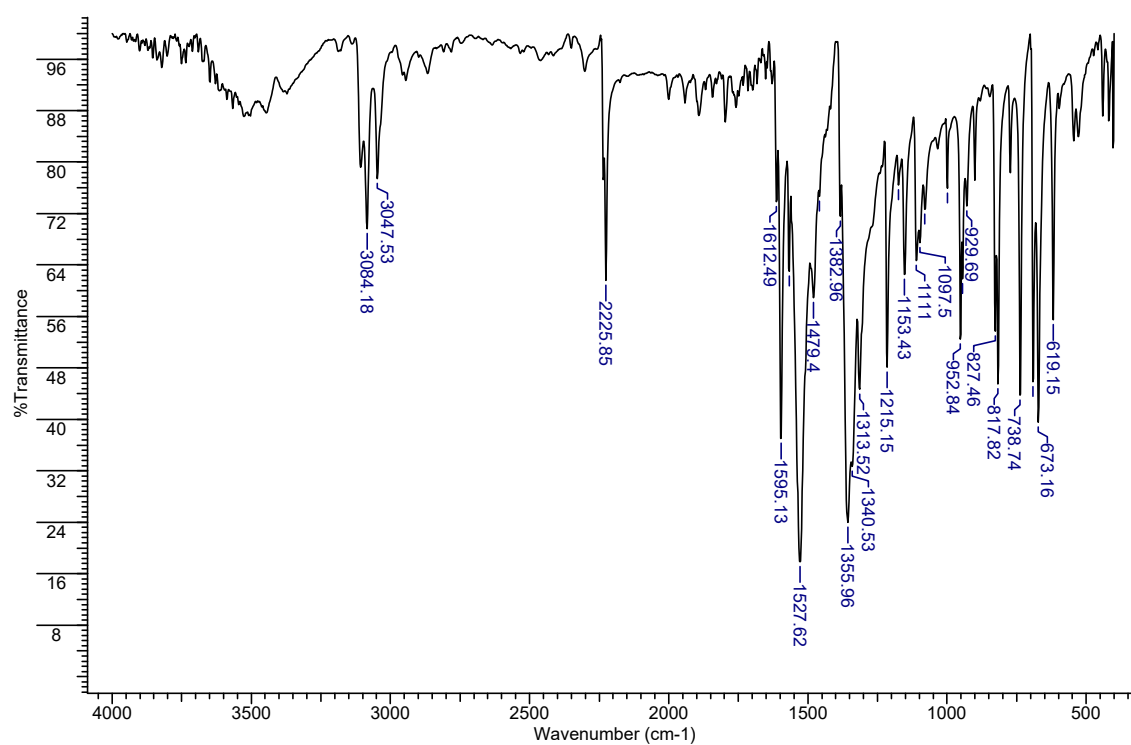

Figure S27. FT-IR of 2-(4-chlorobenzylidene)malononitrile **2g**.

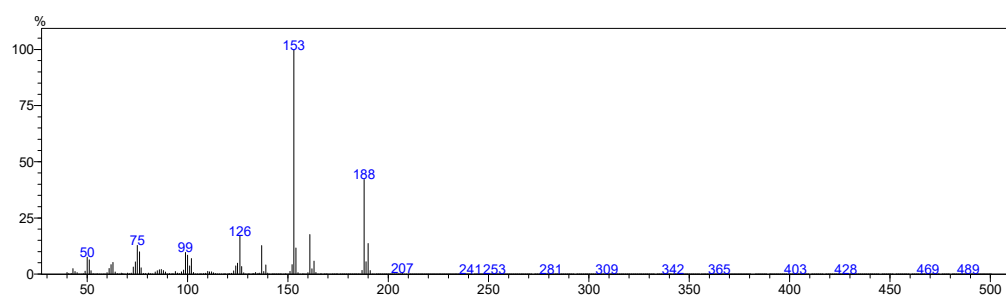

Figure S28. MS (70 eV) of 2-(4-chlorobenzylidene)malononitrile **2g**.

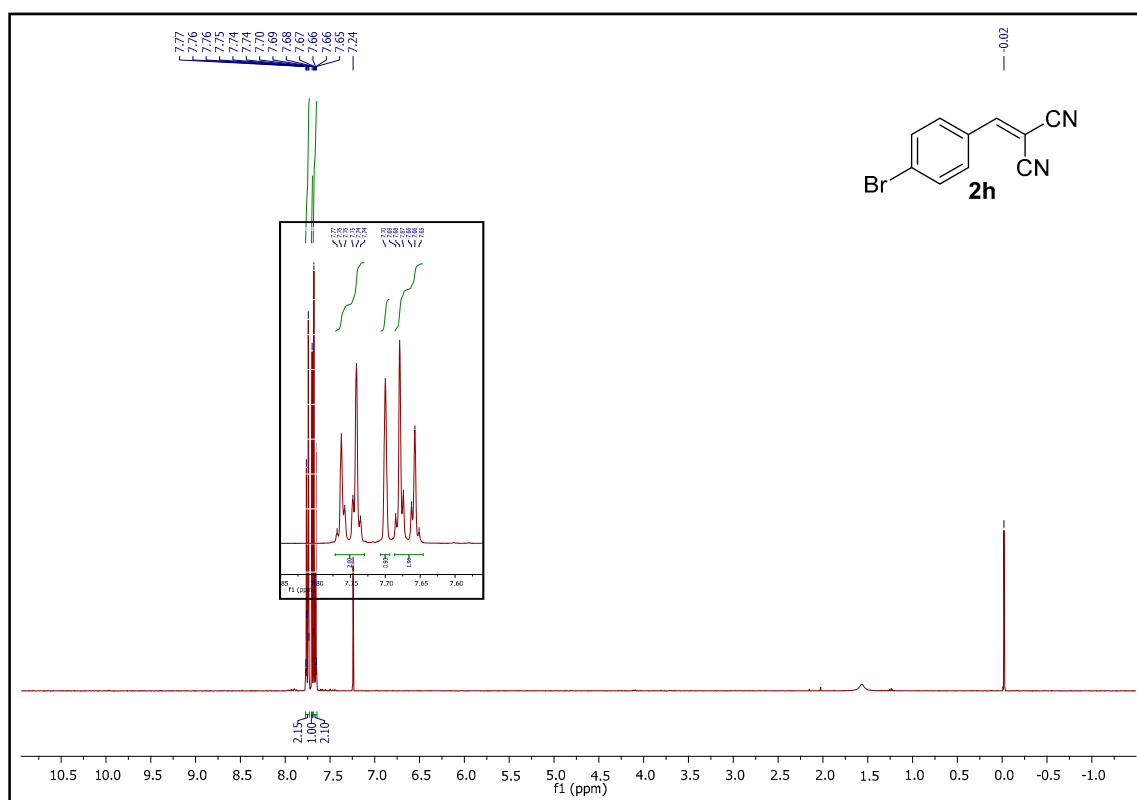

Figure S29. <sup>1</sup>H NMR (400 MHz, CDCl<sub>3</sub>) of 2-(4-bromobenzylidene)malononitrile **2h**.

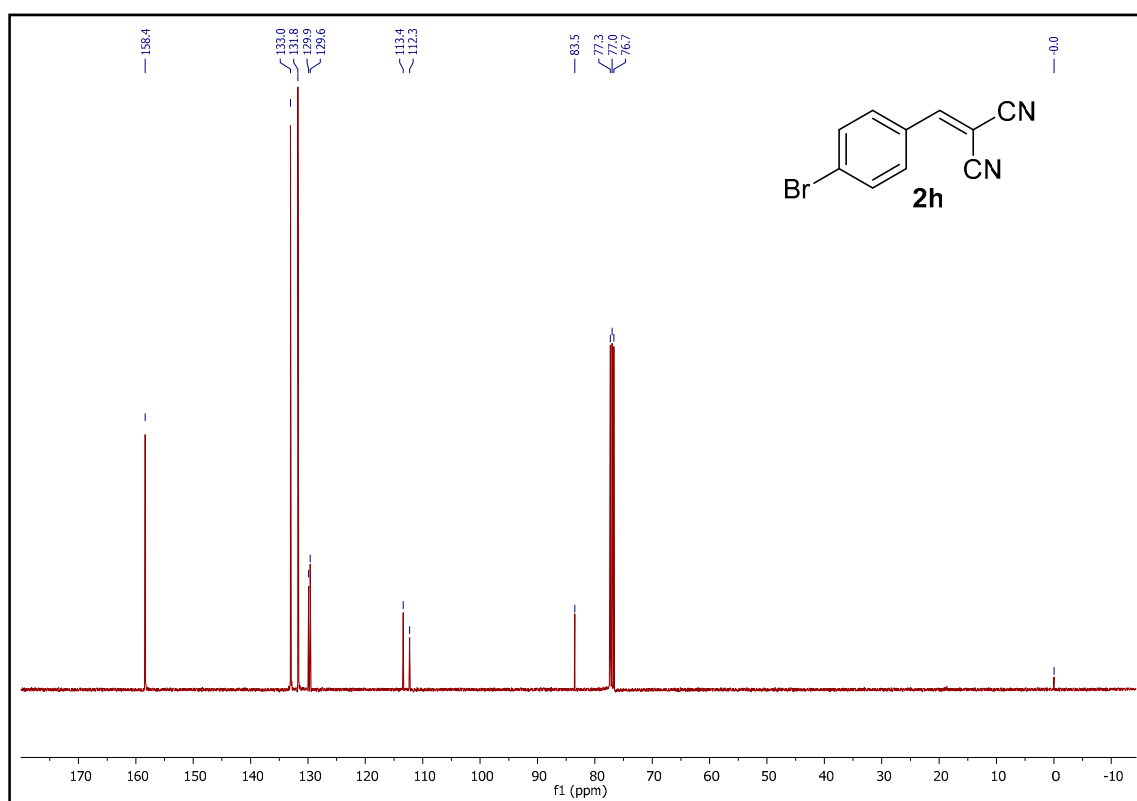

Figure S30. <sup>13</sup>C NMR (100 MHz, CDCl<sub>3</sub>) of 2-(4-bromobenzylidene)malononitrile **2h**.



Figure S31. FT-IR of 2-(4-bromobenzylidene)malononitrile **2h**.

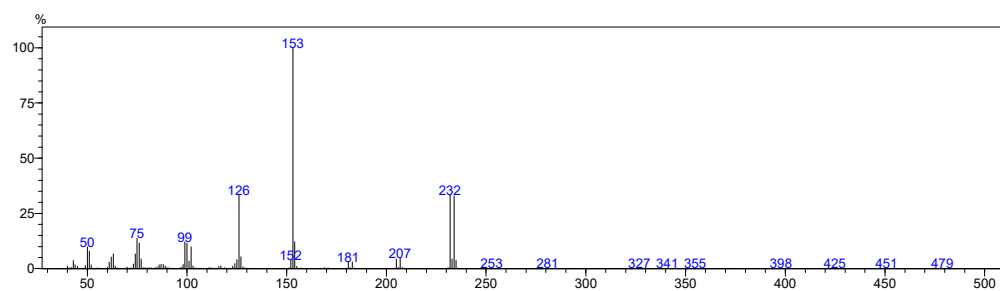

Figure S32. MS (70 eV) of 2-(4-bromobenzylidene)malononitrile **2h**.

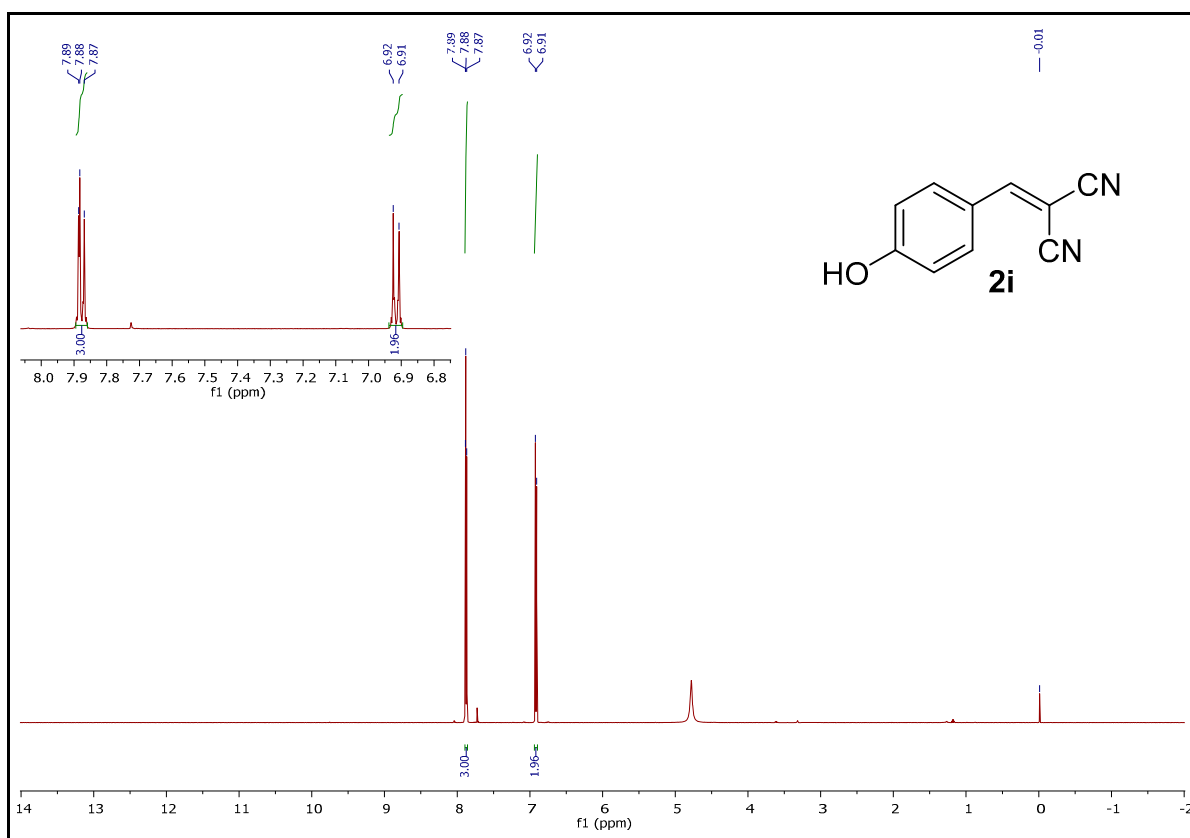Figure S33. <sup>1</sup>H NMR (500 MHz, CDCl<sub>3</sub>) of 2-(4-hydroxybenzylidene)malononitrile **2i**.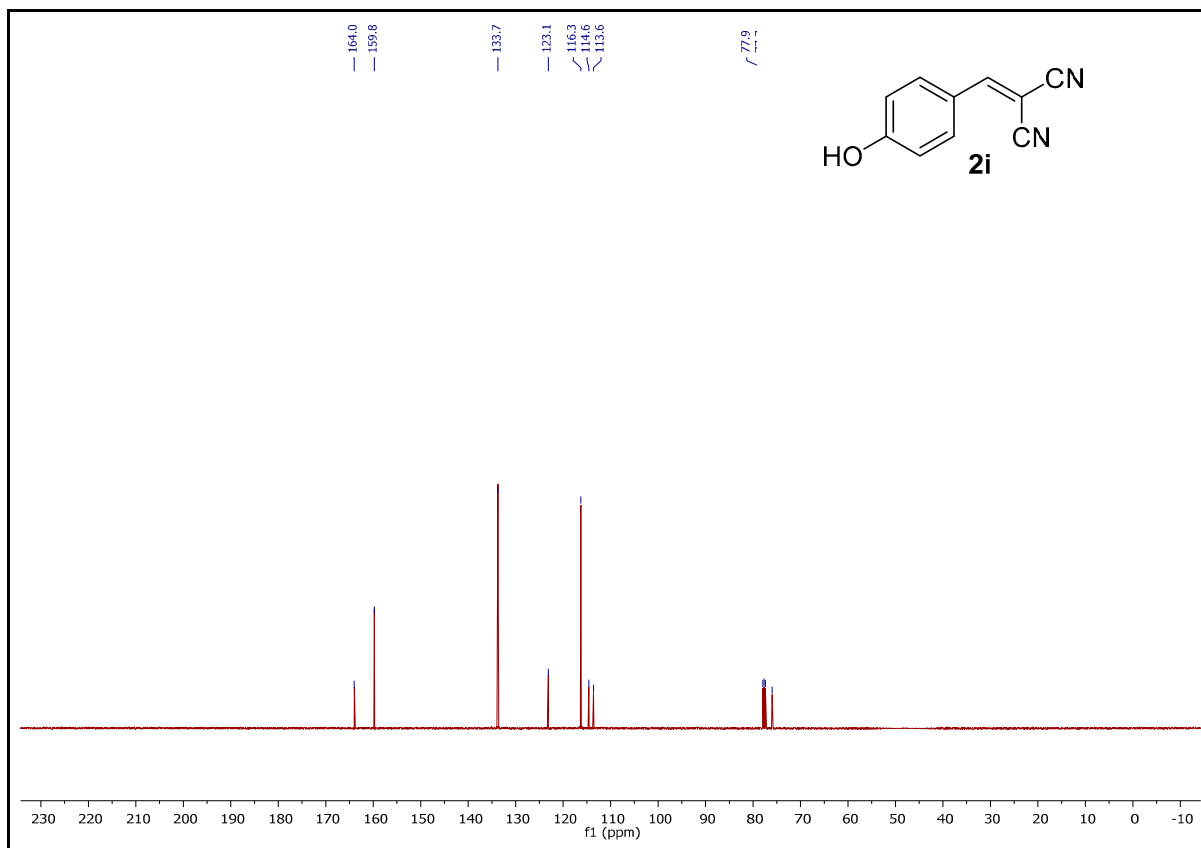Figure S34. <sup>13</sup>C NMR (125 MHz, CDCl<sub>3</sub>) of 2-(4-hydroxybenzylidene)malononitrile **2i**.

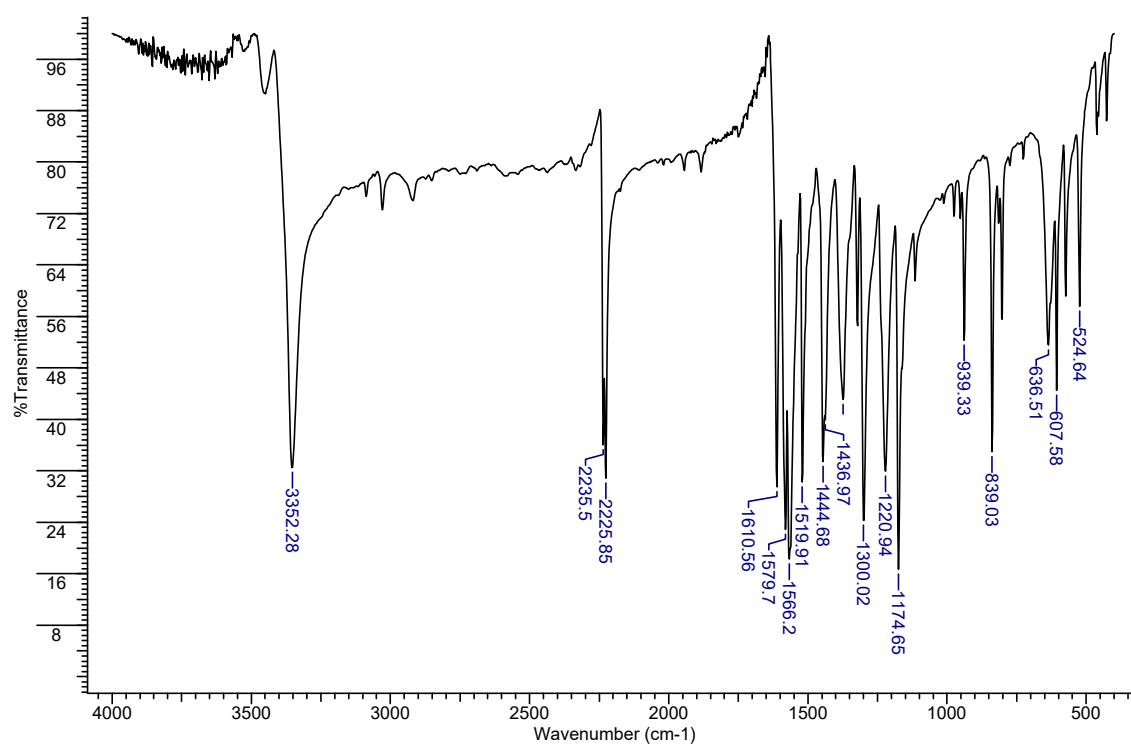

Figure S35. FT-IR of 2-(4-hydroxybenzylidene)malononitrile **2i**.

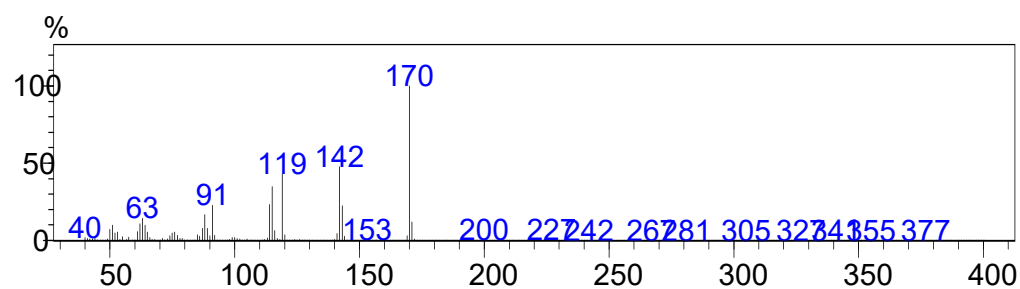

Figure S36. MS (70 eV) of 2-(4-hydroxybenzylidene)malononitrile **2i**.

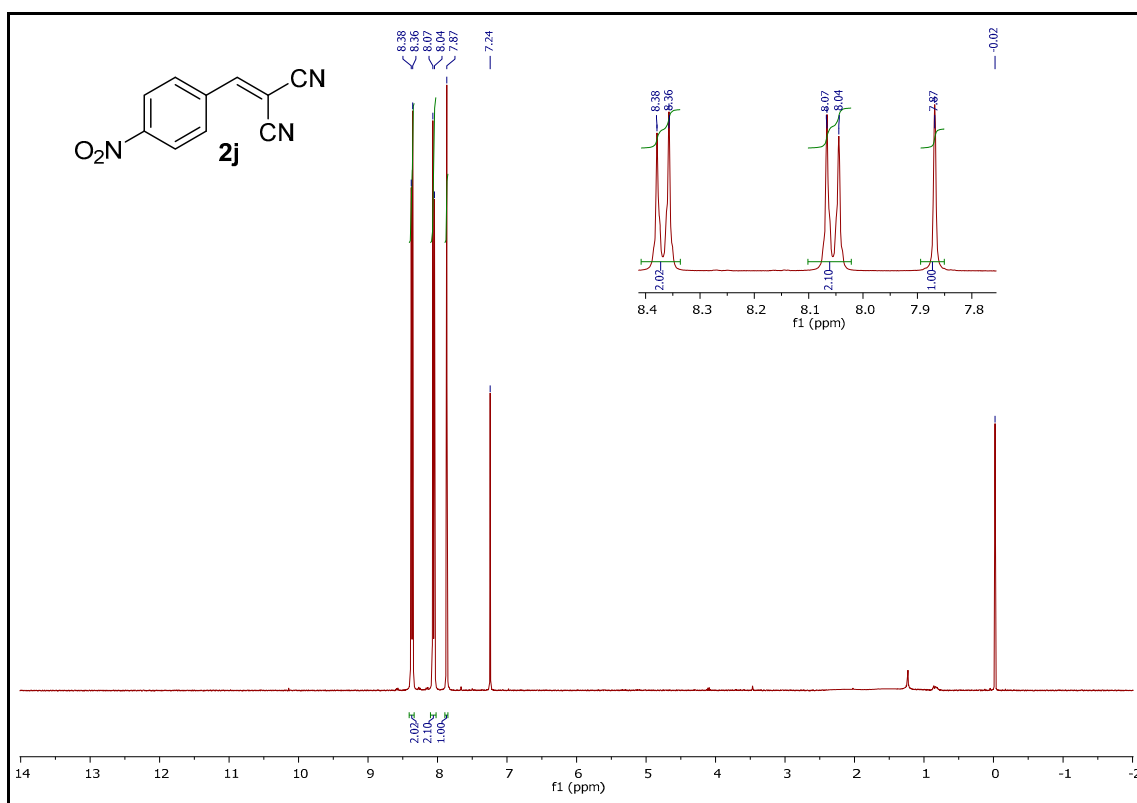

Figure S37. <sup>1</sup>H NMR (500 MHz, CDCl<sub>3</sub>) of 2-(4-nitrobenzylidene)malononitrile **2j**.

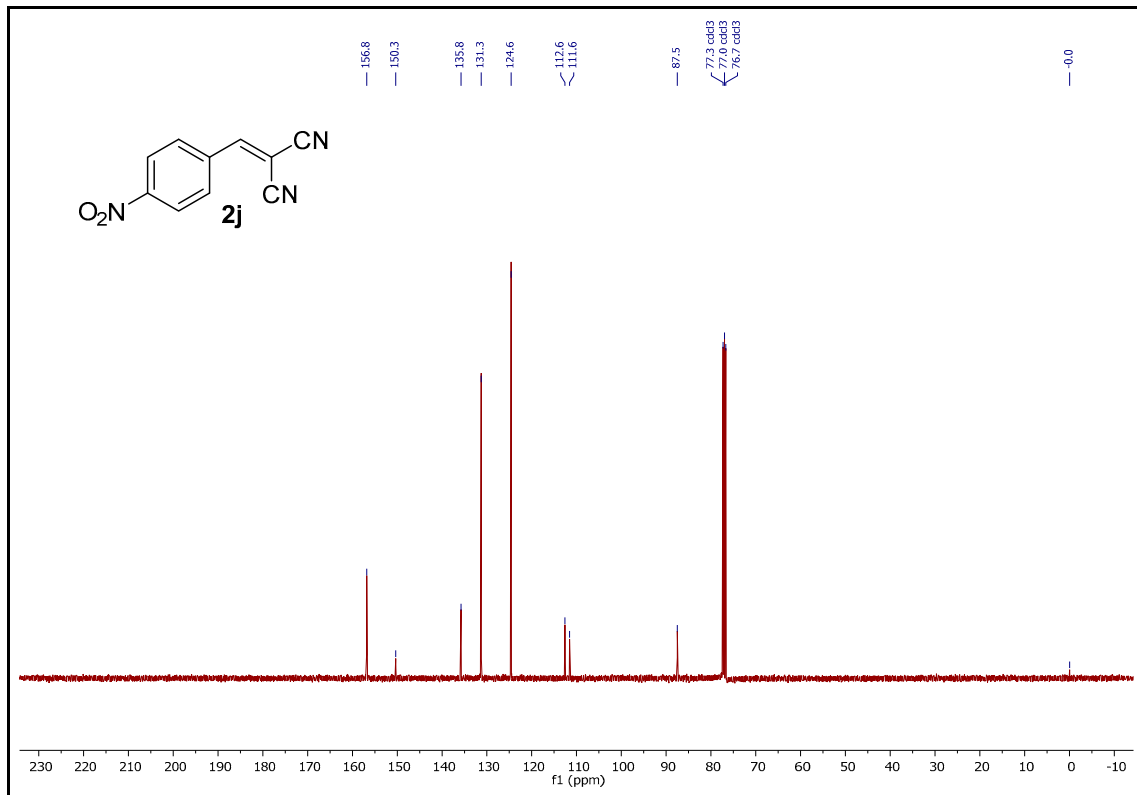

Figure S38. <sup>13</sup>C NMR (125 MHz, CDCl<sub>3</sub>) of 2-(4-nitrobenzylidene)malononitrile **2j**.

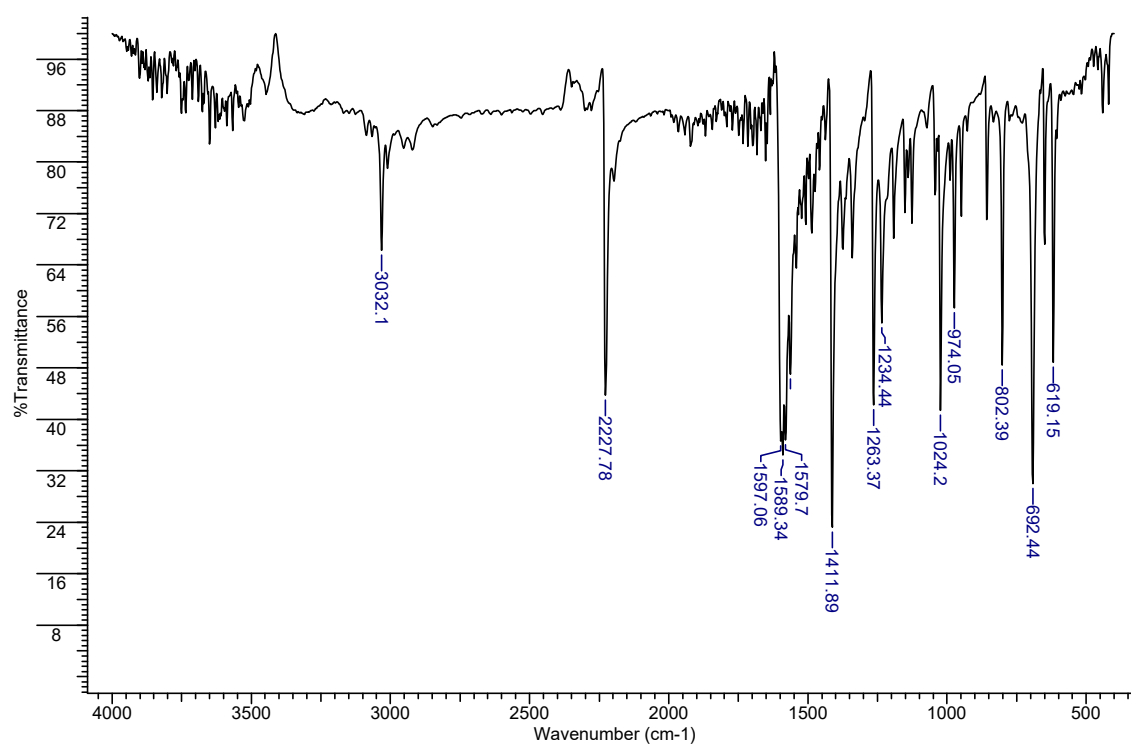

Figure S39. FT-IR of 2-(4-nitrobenzylidene)malononitrile **2j**.

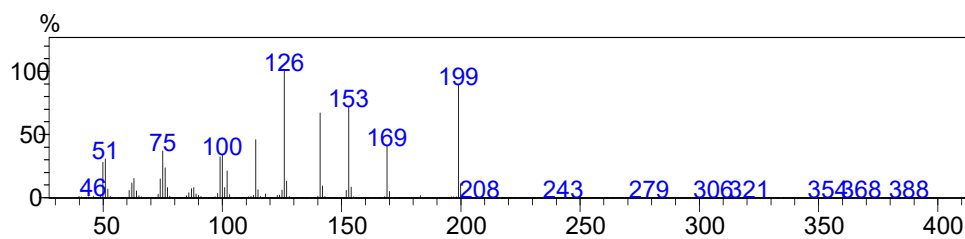

Figure S40. MS (70 eV) of 2-(4-nitrobenzylidene)malononitrile **2j**.

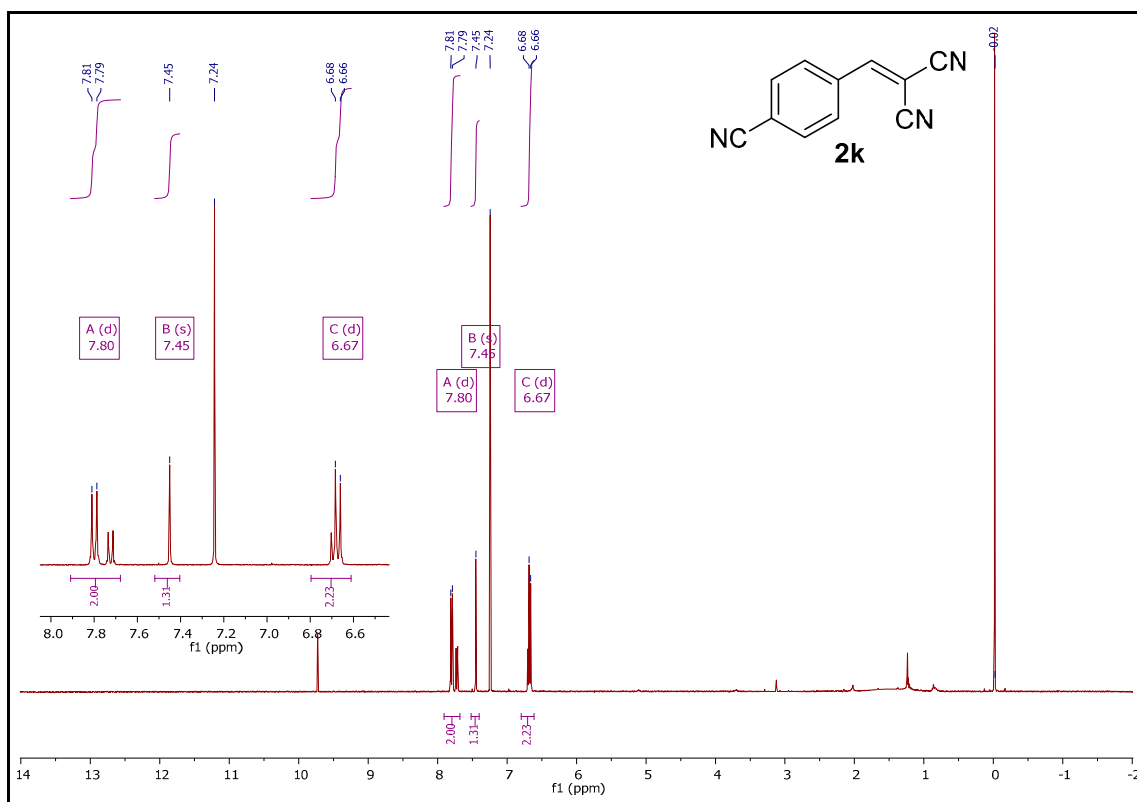

Figure S41. <sup>1</sup>H NMR (400 MHz, CDCl<sub>3</sub>) of 2-(4-cyanobenzylidene)malononitrile **2k**.

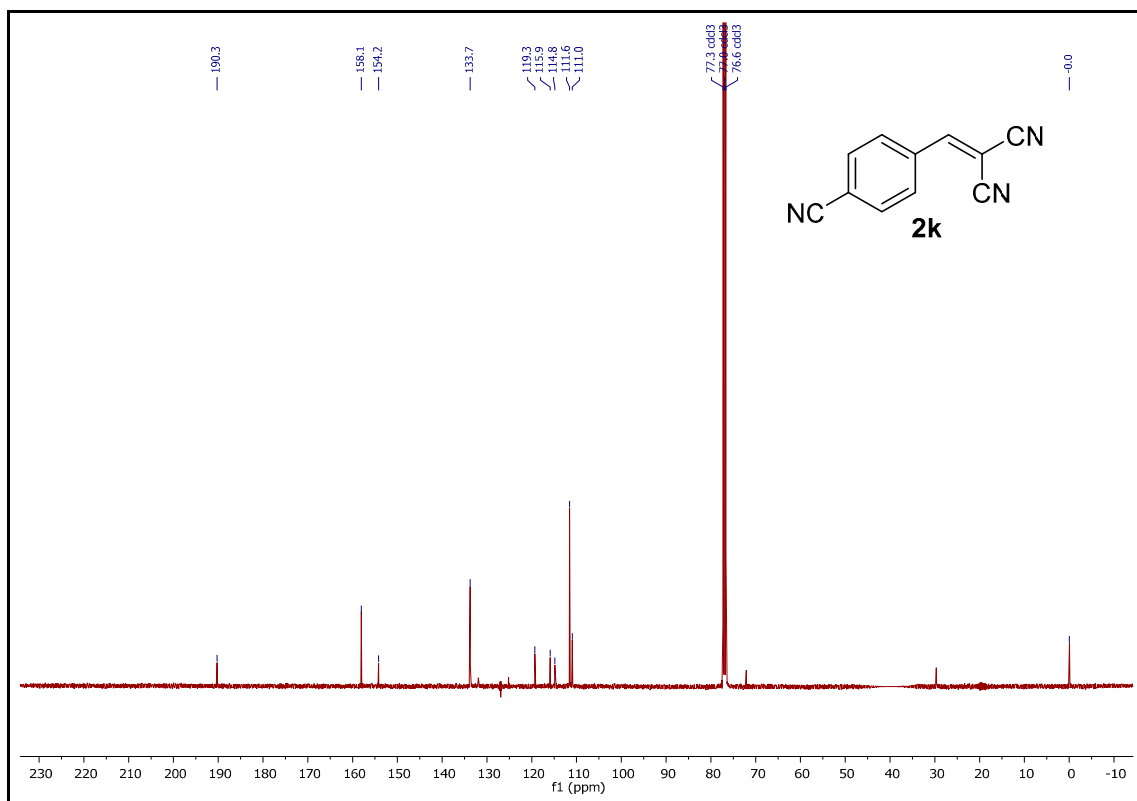

Figure S42. <sup>13</sup>C NMR (100 MHz, CDCl<sub>3</sub>) of 2-(4-cyanobenzylidene)malononitrile **2k**.

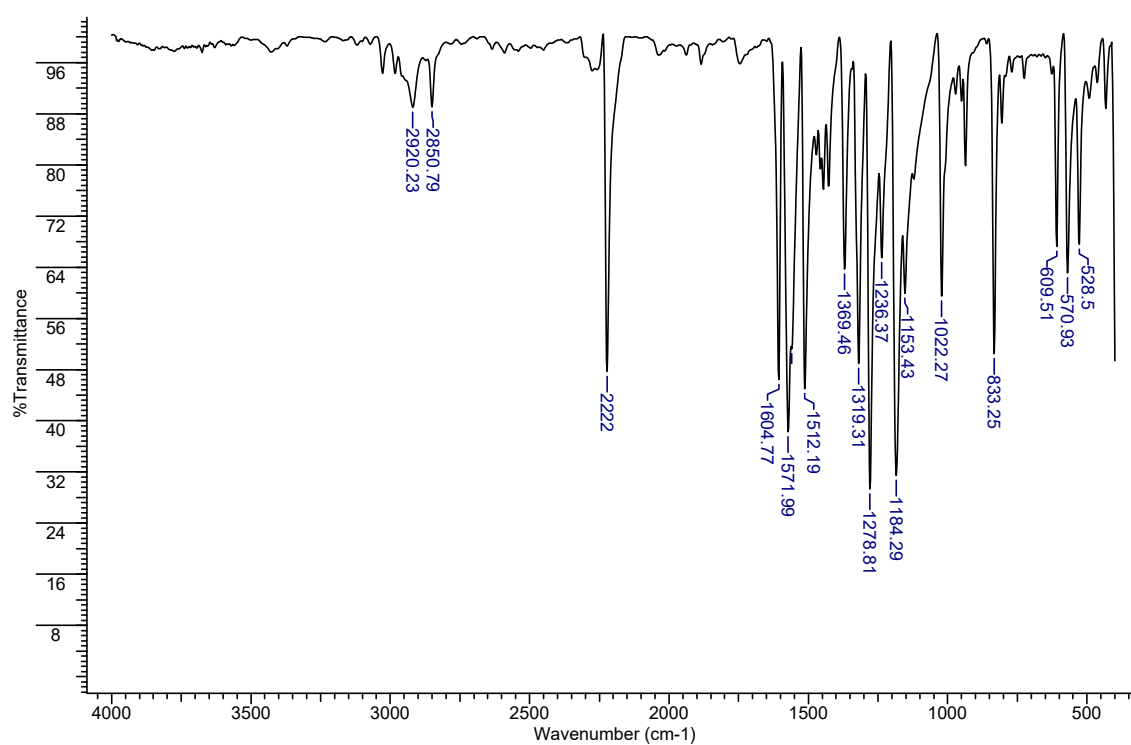

Figure S43. FT-IR of 2-(4-cyanobenzylidene)malononitrile **2k**.

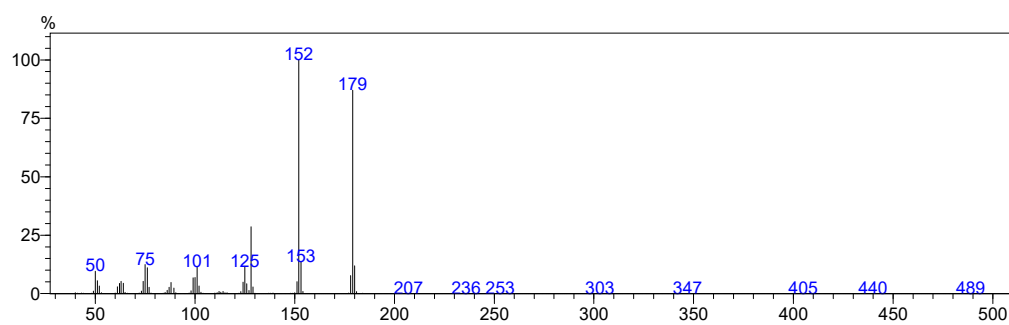

Figure S44. MS (70 eV) of 2-(4-cyanobenzylidene)malononitrile **2k**.

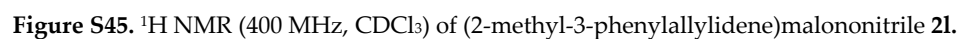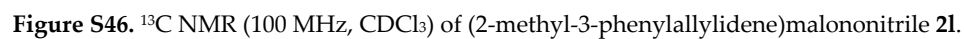

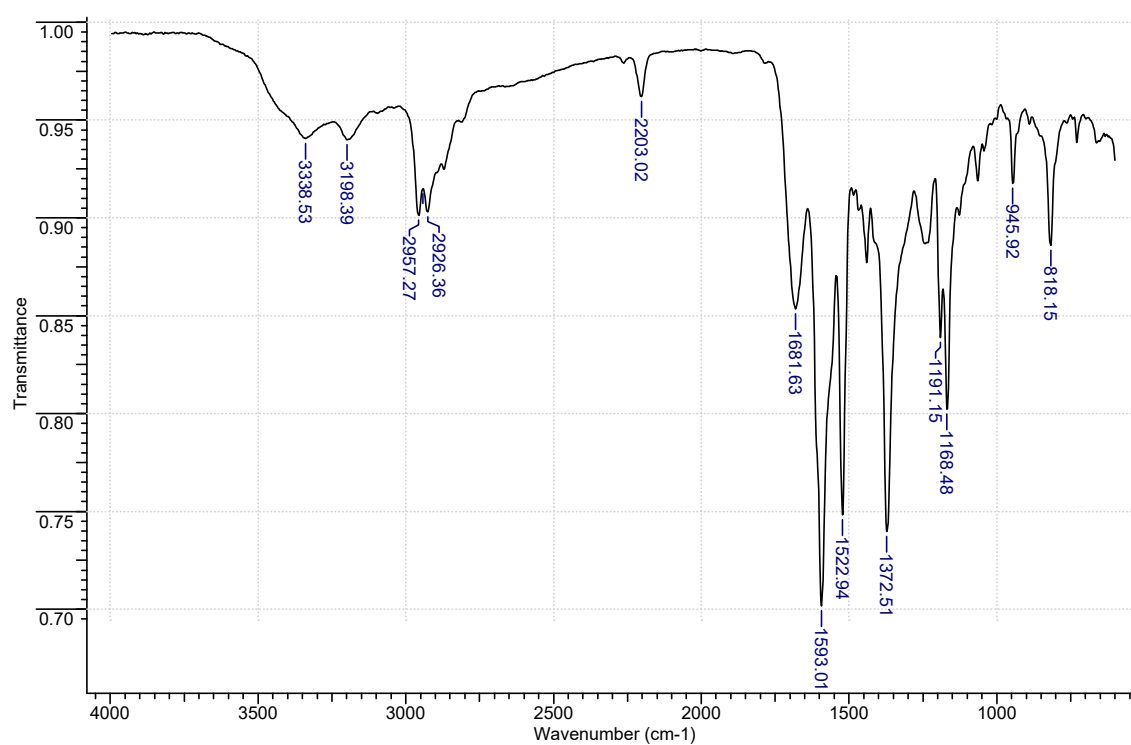

Figure S47. FT-IR of 2-(3-phenylallylidene)malononitrile 21.

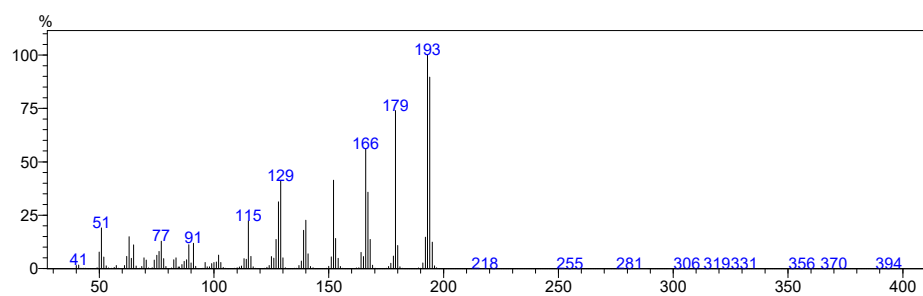

Figure S48. MS (70 eV) of 2-(3-phenylallylidene)malononitrile 21.
